# Supplementary material for: Design, synthesis, and biological evaluation of diaminopyrimidine derivatives as novel focal adhesion kinase inhibitors
Source: Royal Society of Chemistry journal article supplement (doi:10.1039/d3md00324h), 2023-01-01

The <sup>1</sup>H-NMR and HR-MS spectrum of compound A1

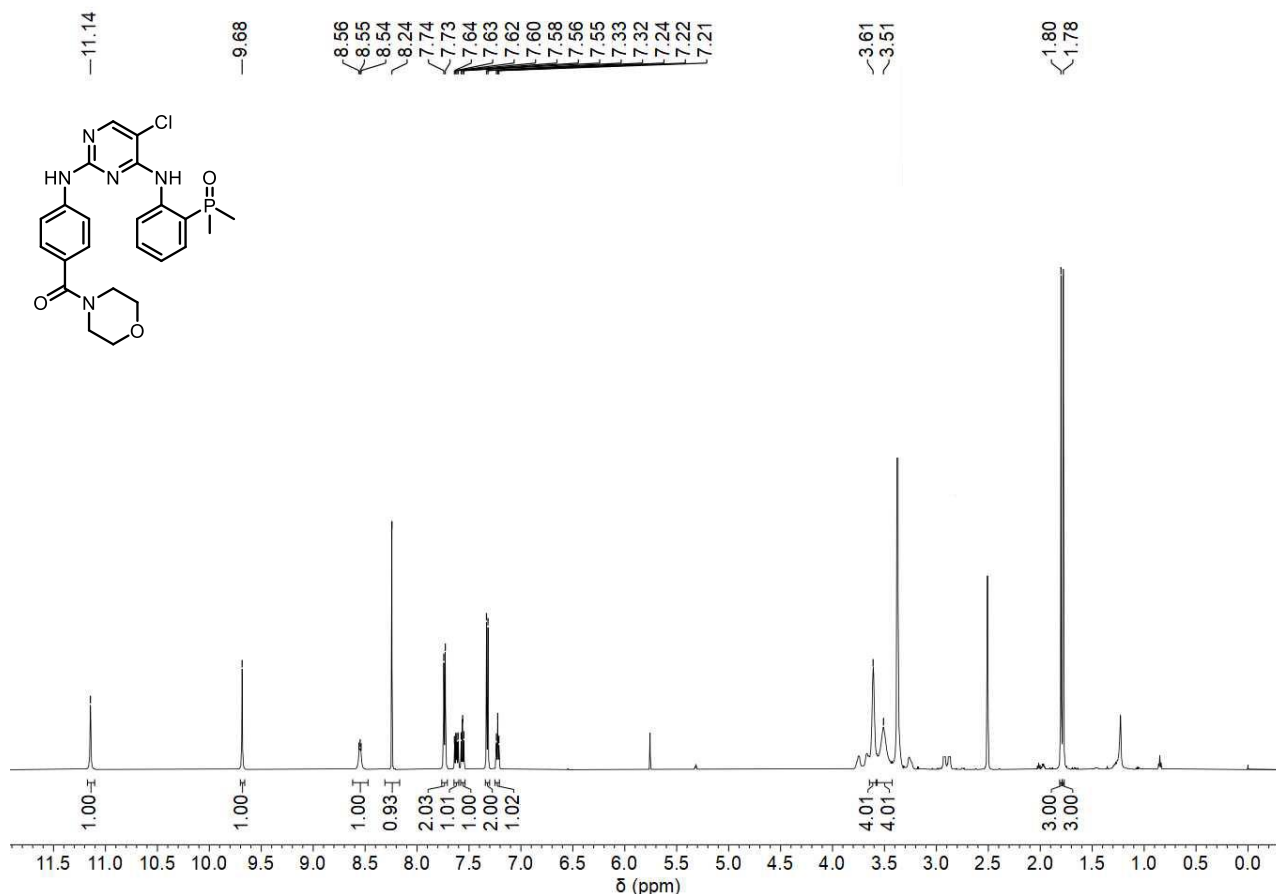

### User Spectra

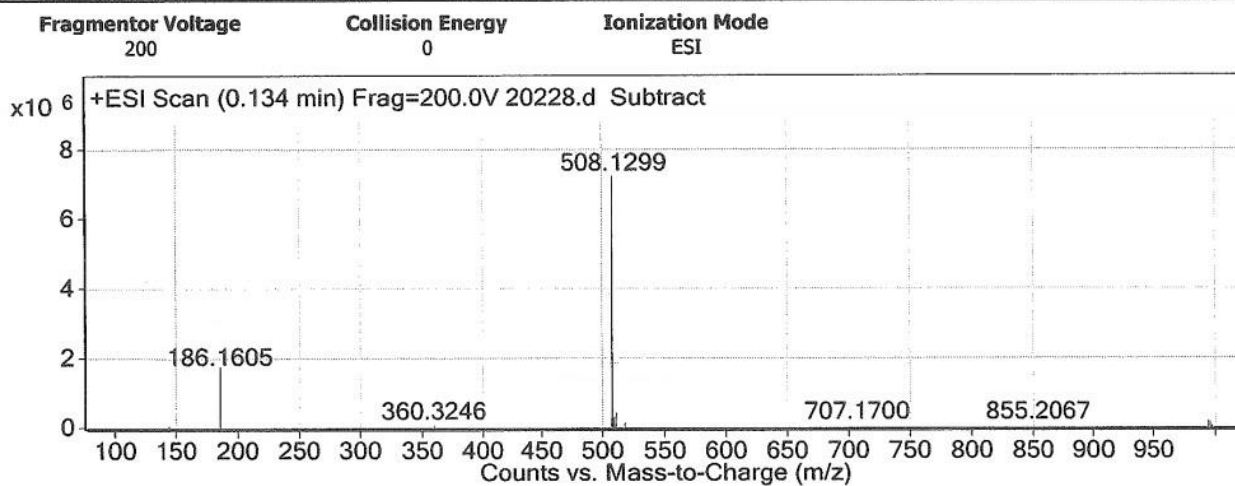

The <sup>1</sup>H-NMR and HR-MS spectrum of compound **A2**

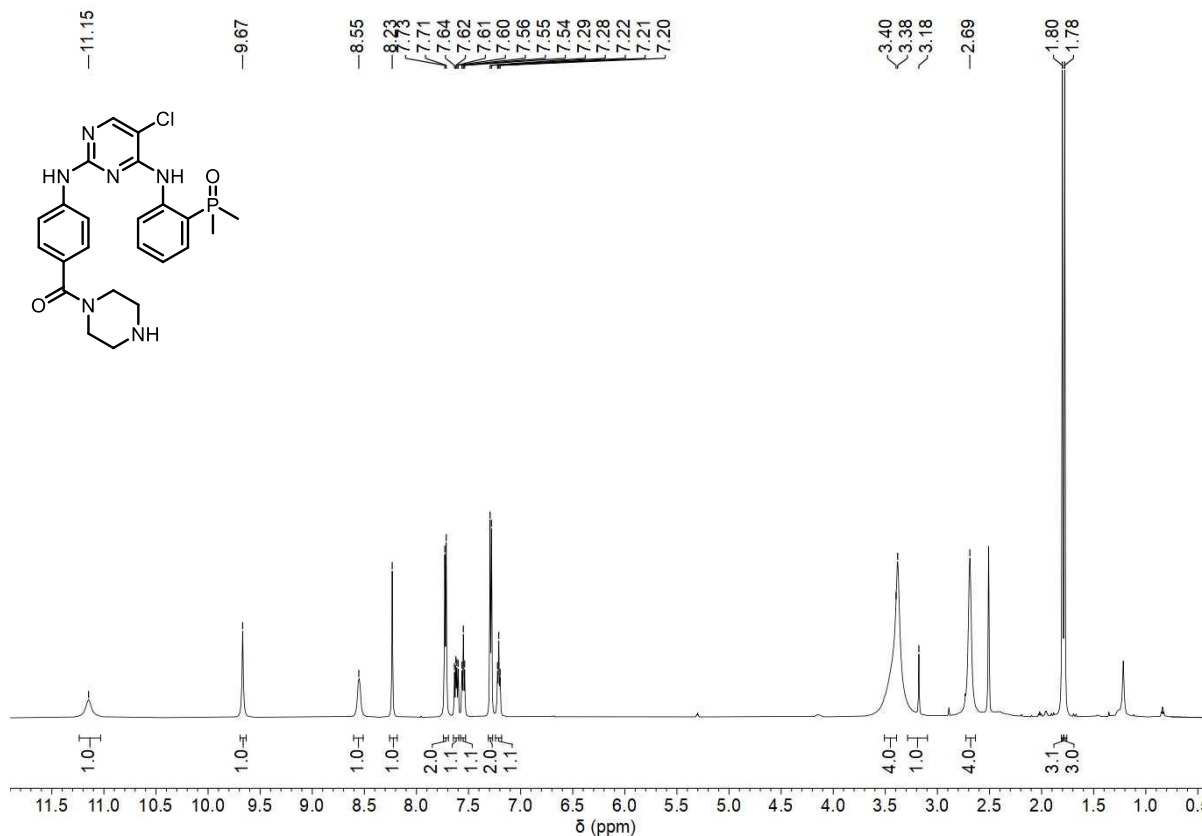

User Spectra

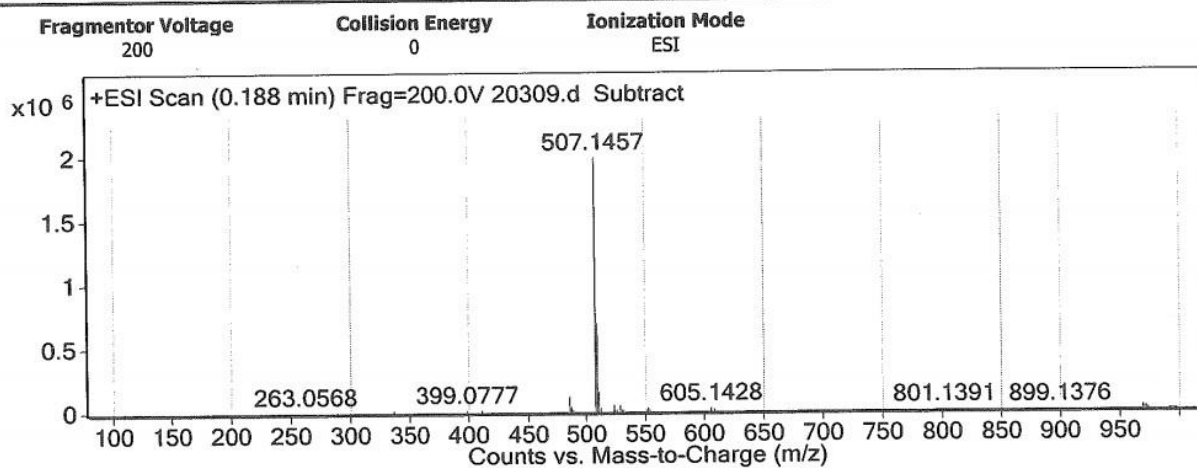

The <sup>1</sup>H-NMR and HR-MS spectrum of compound **A3**

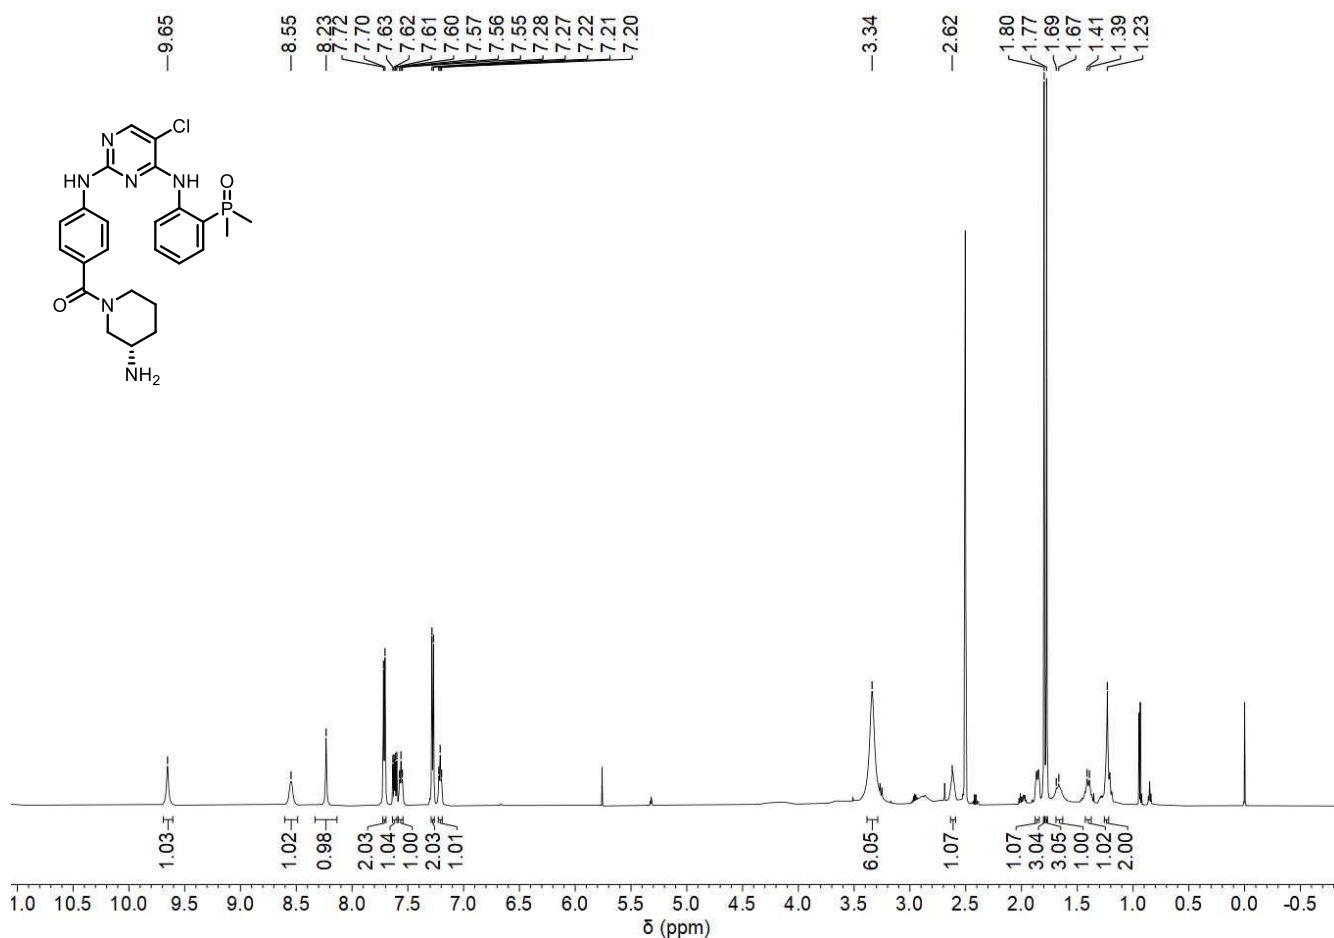

User Spectra

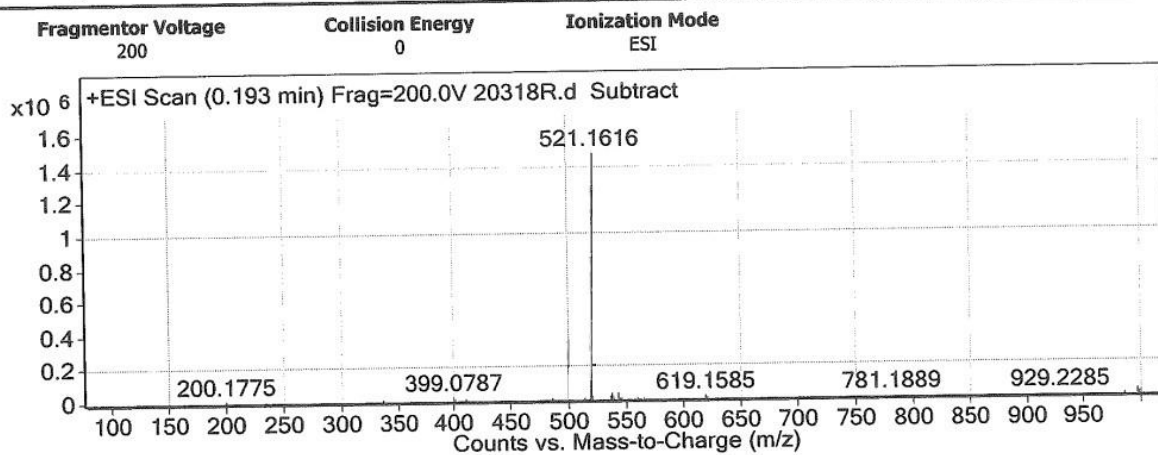

The <sup>1</sup>H-NMR and HR-MS spectrum of compound A4

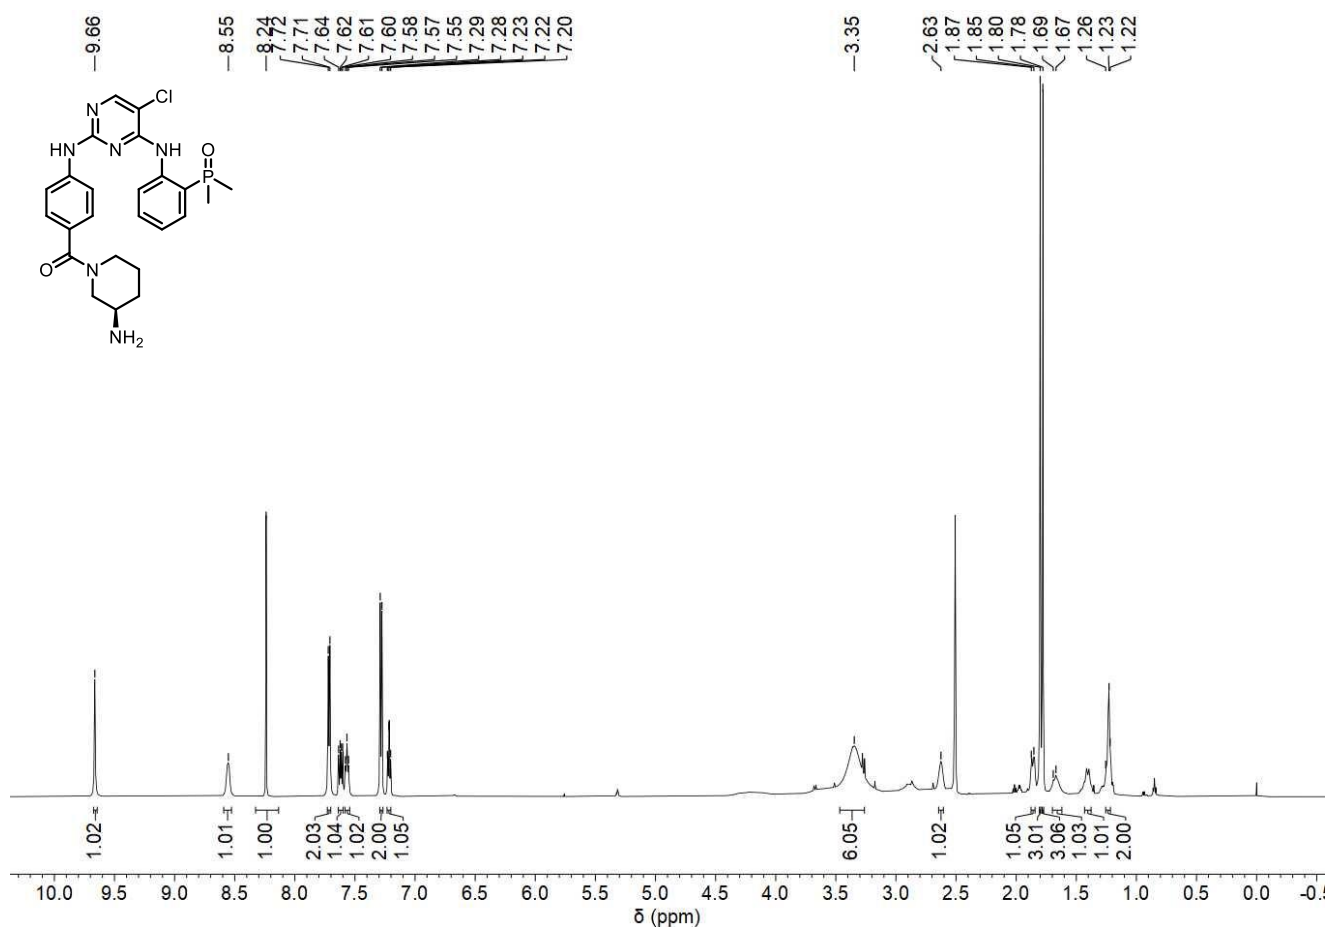

User Spectra

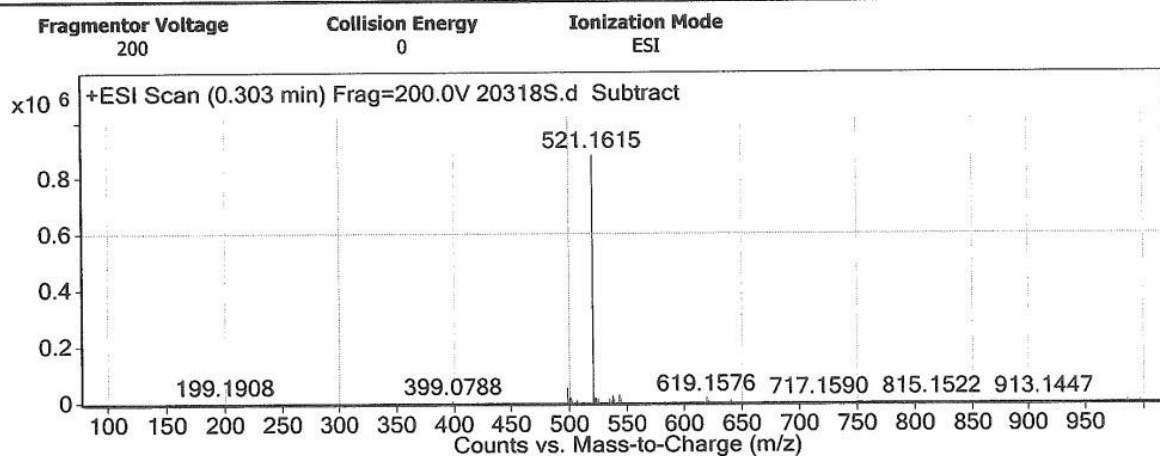

The <sup>1</sup>H-NMR and HR-MS spectrum of compound A5

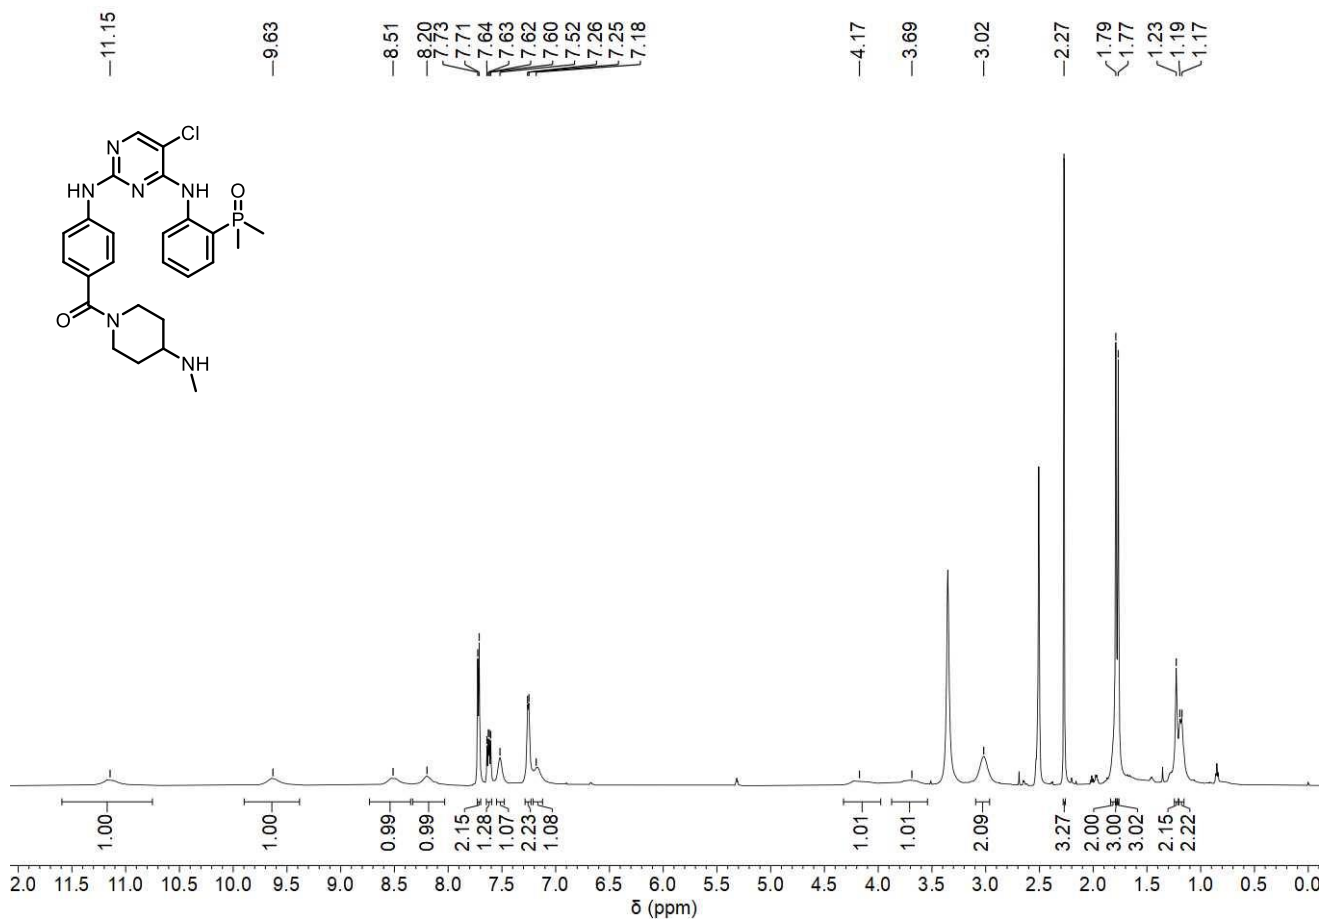

User Spectra

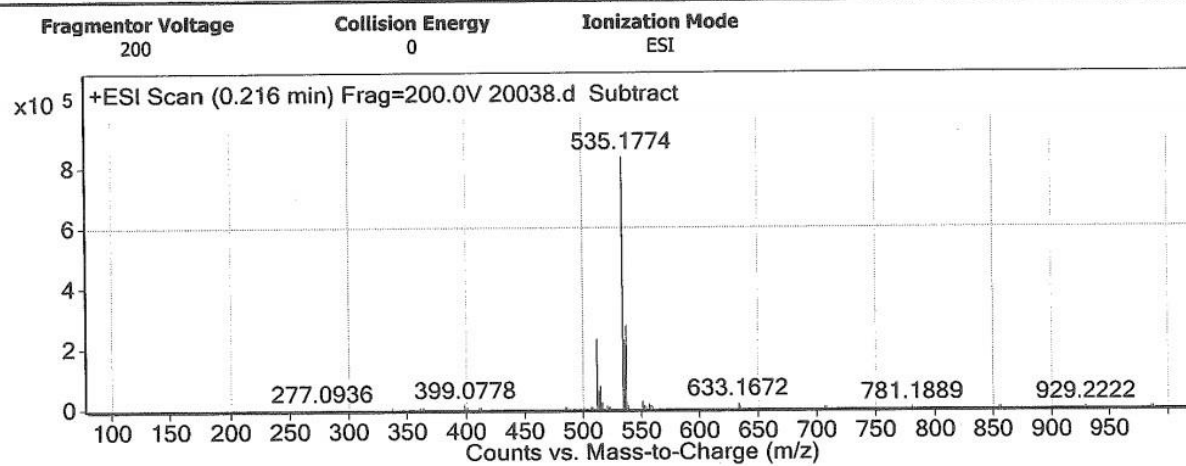

The <sup>1</sup>H-NMR and HR-MS spectrum of compound A6

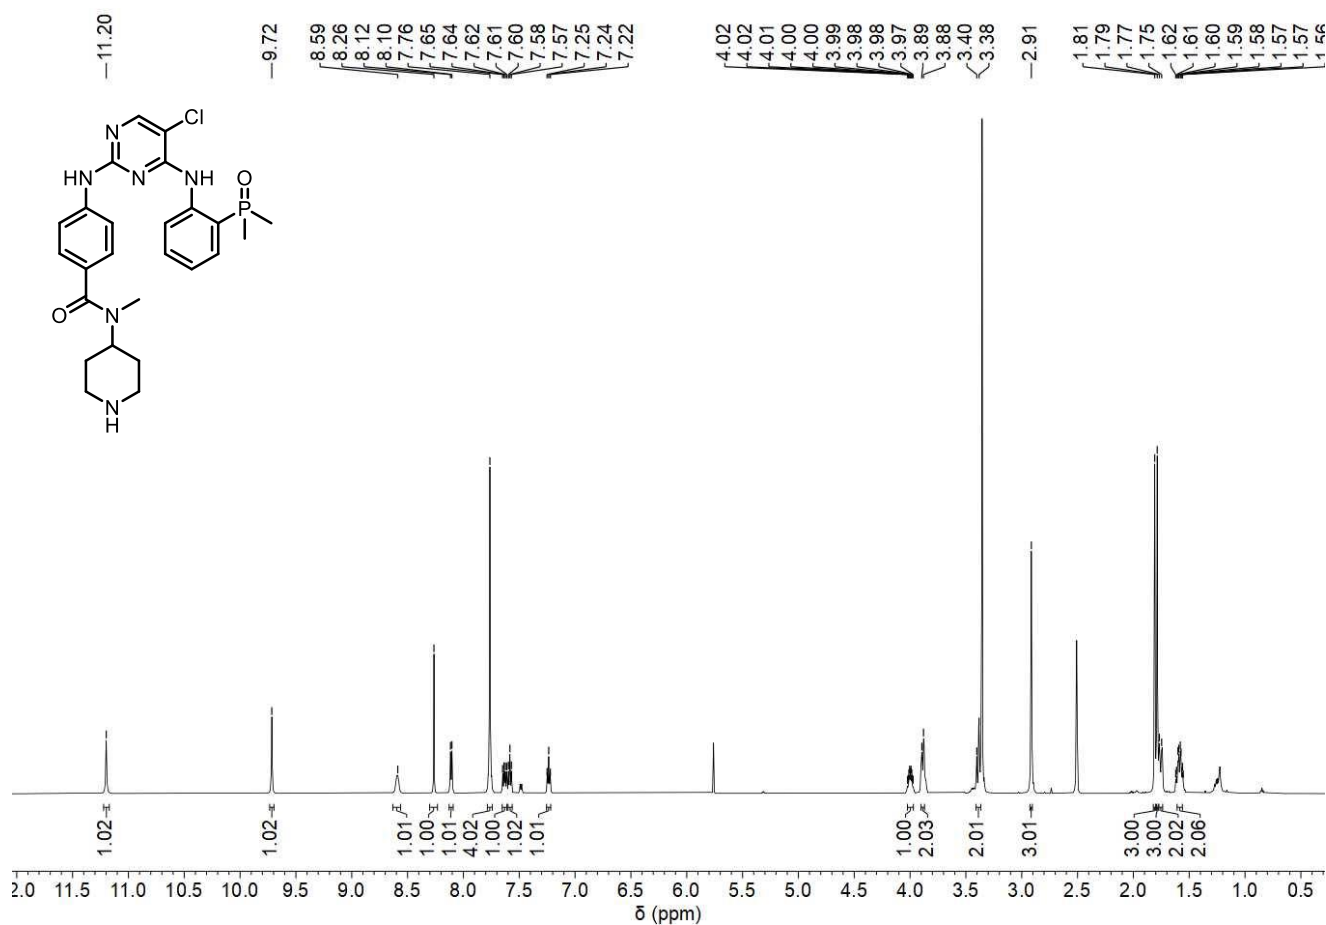

User Spectra

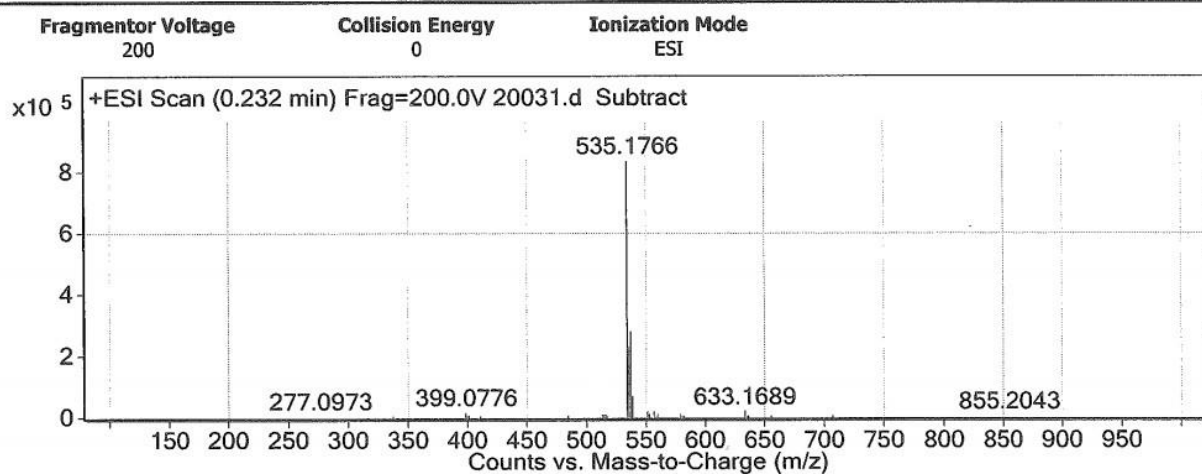

The <sup>1</sup>H-NMR and HR-MS spectrum of compound A7

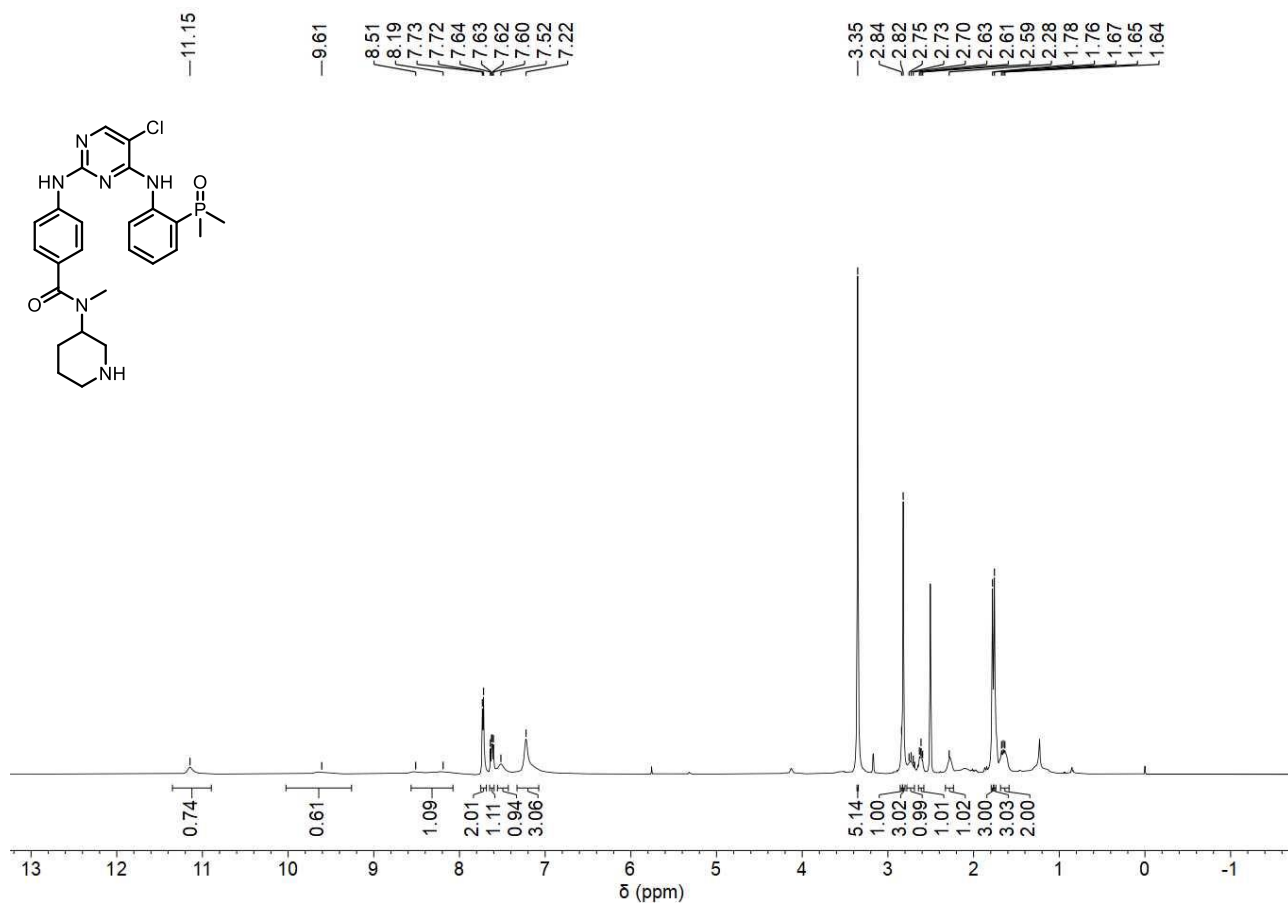

User Spectra

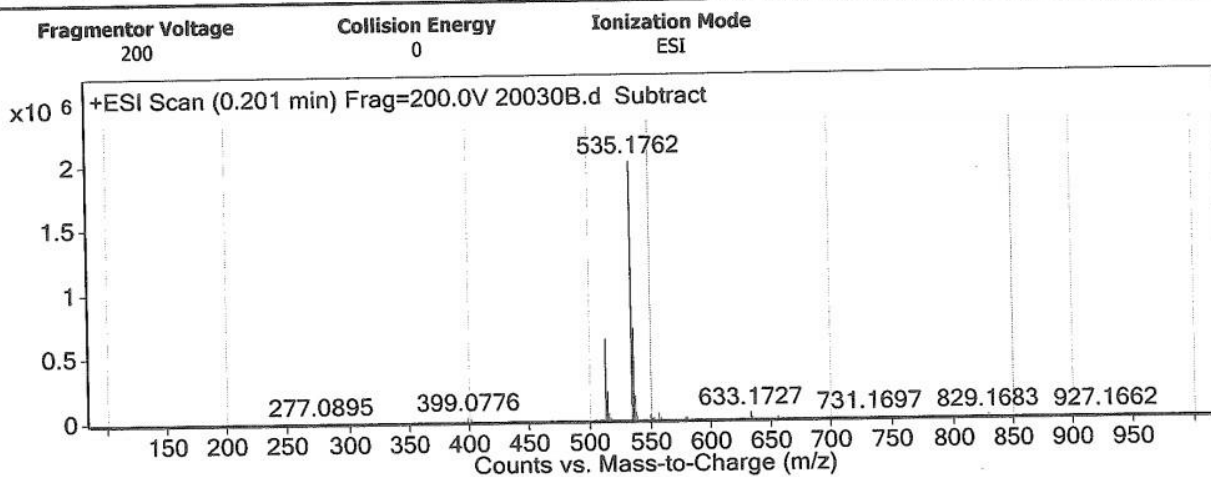

The <sup>1</sup>H-NMR, <sup>13</sup>C-NMR and HR-MS spectrum of compound **A8**

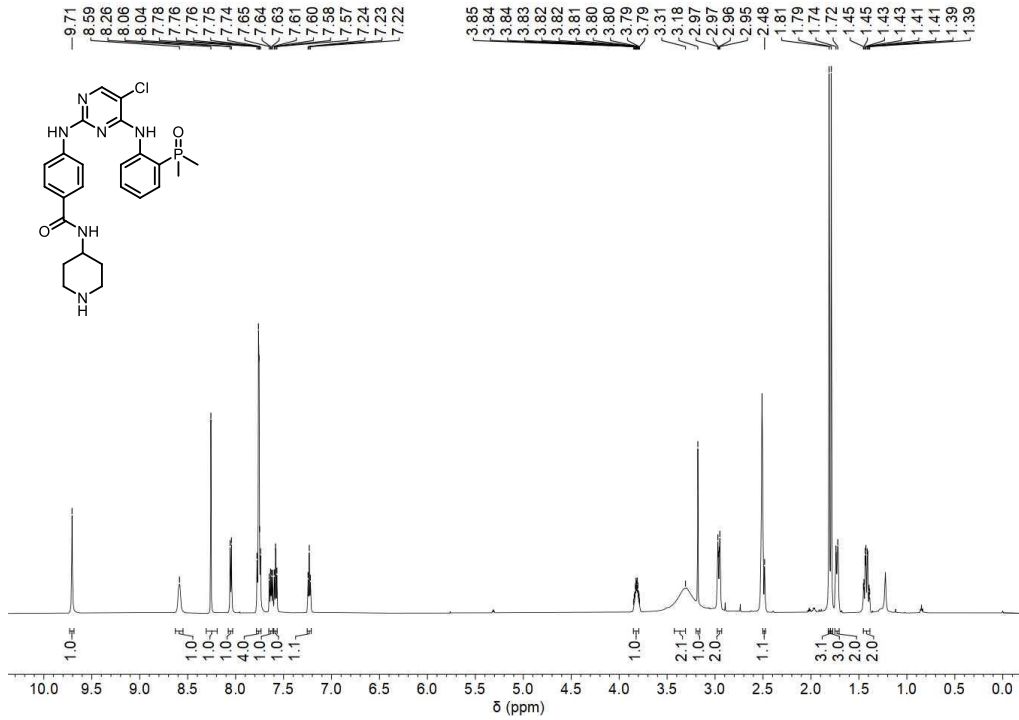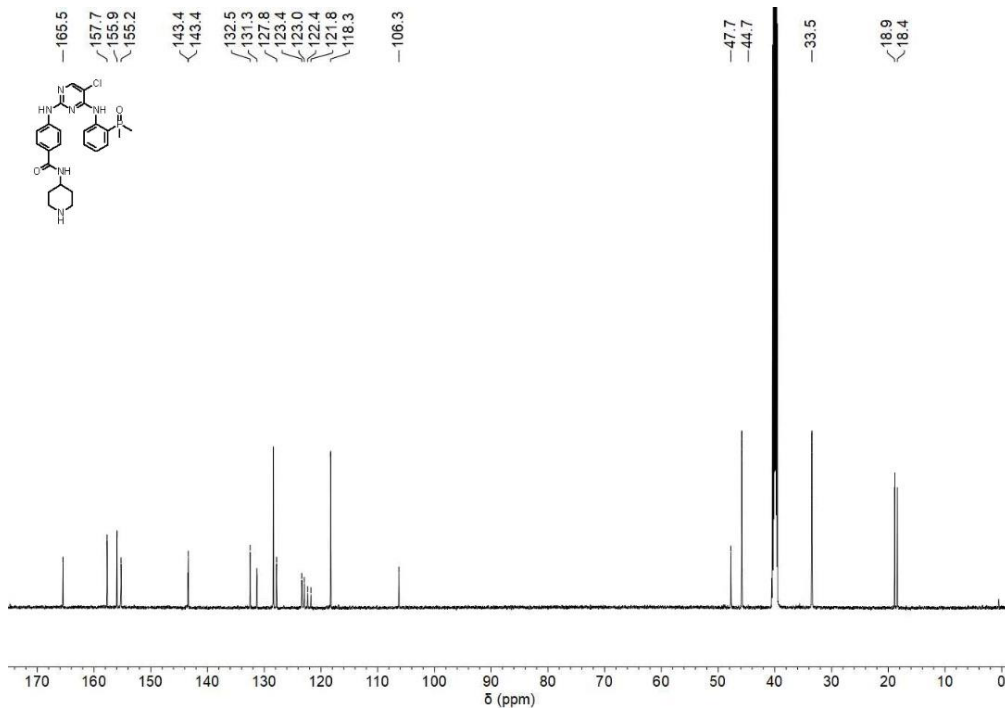

User Spectra

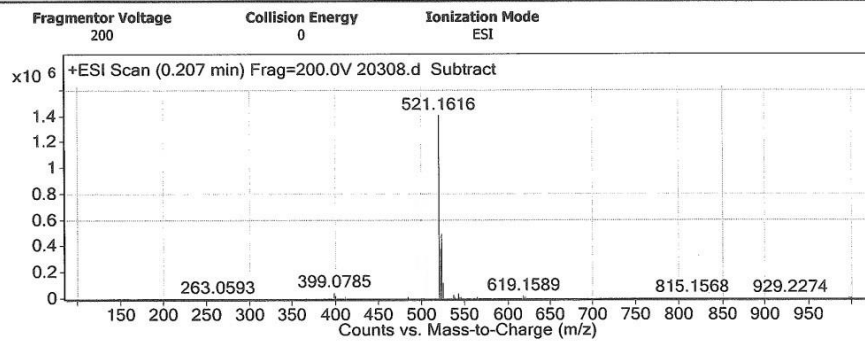



The  $^1\text{H-NMR}$ ,  $^{13}\text{C-NMR}$  and HR-MS spectrum of compound **A9**

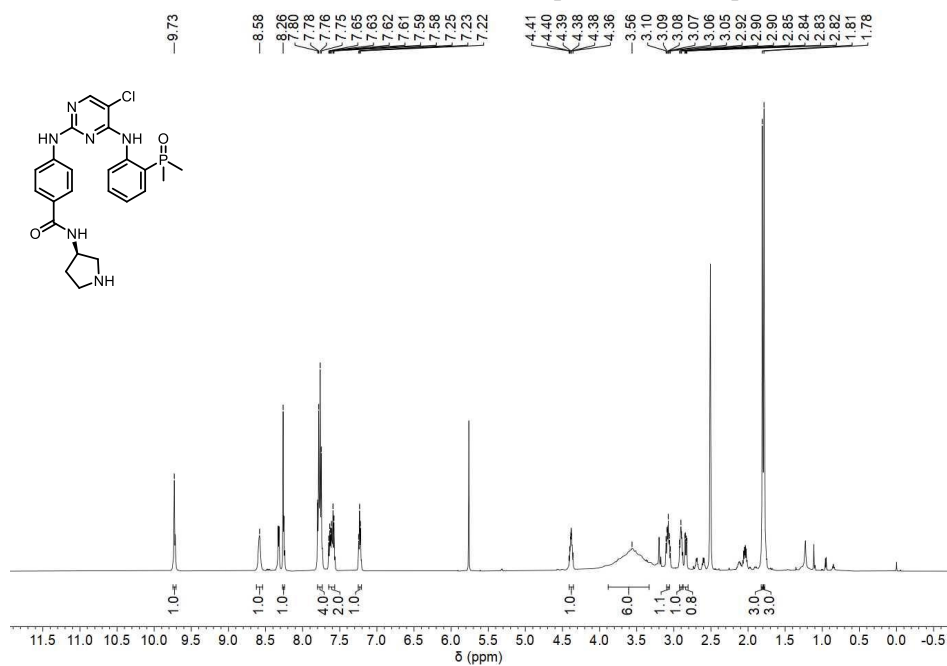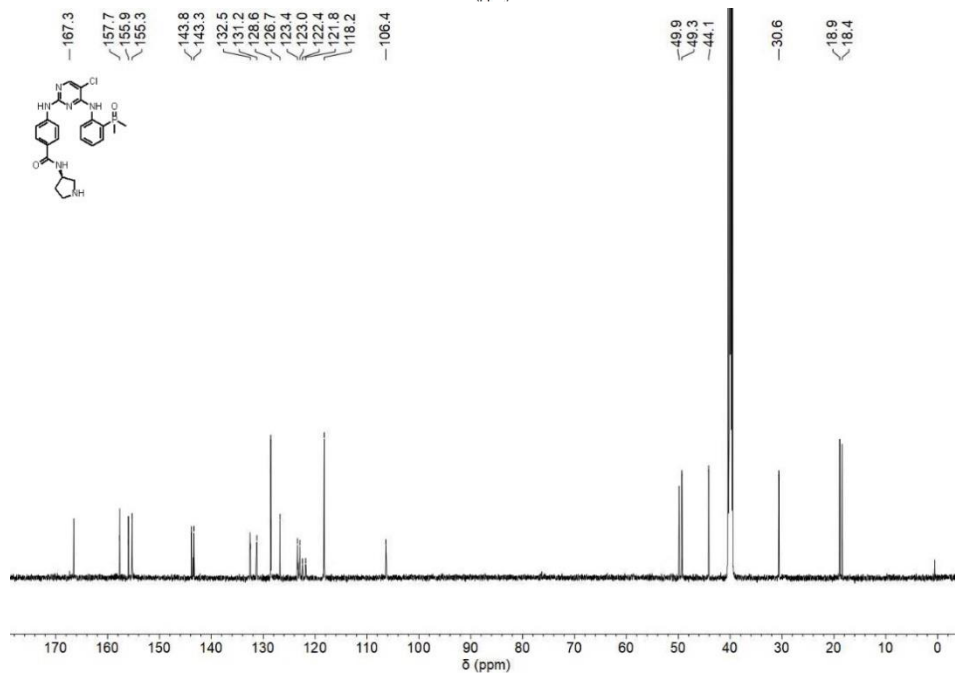

User Spectra

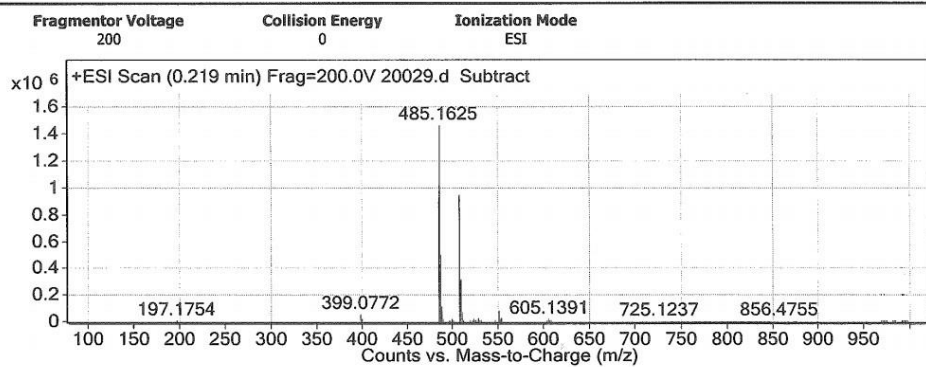

The <sup>1</sup>H-NMR and HR-MS spectrum of compound A10

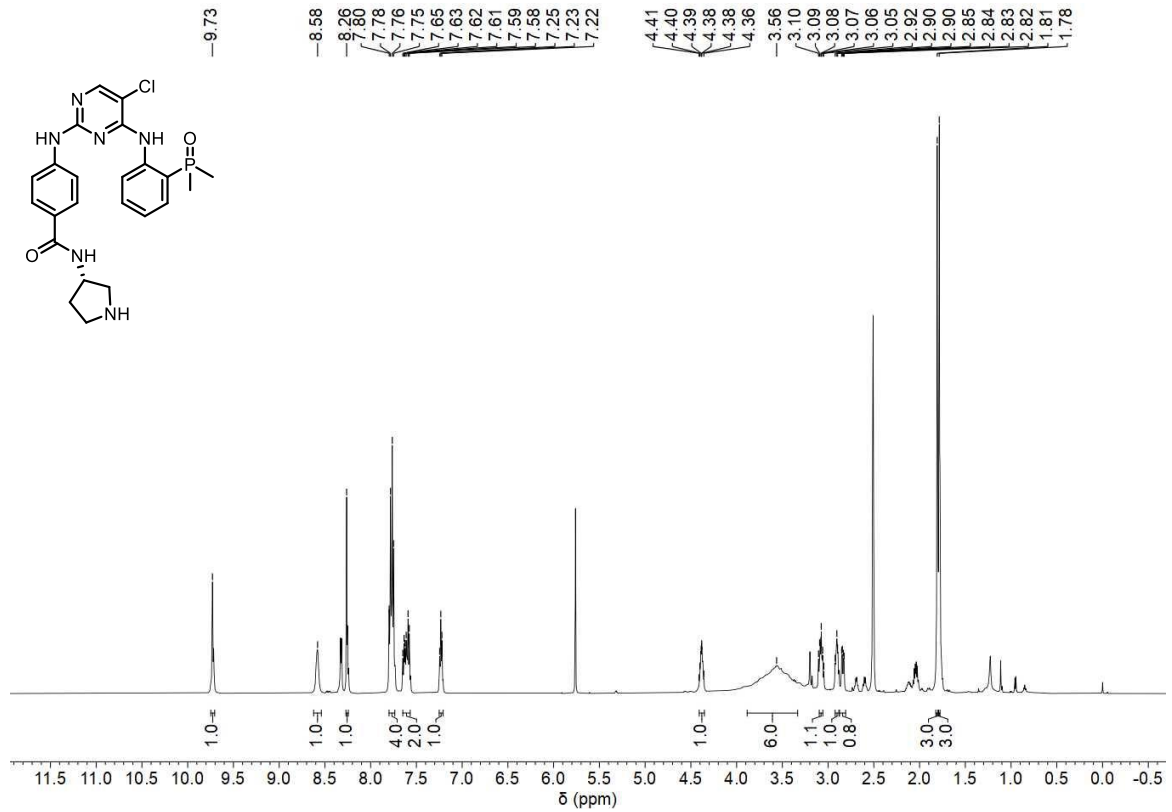

User Spectra

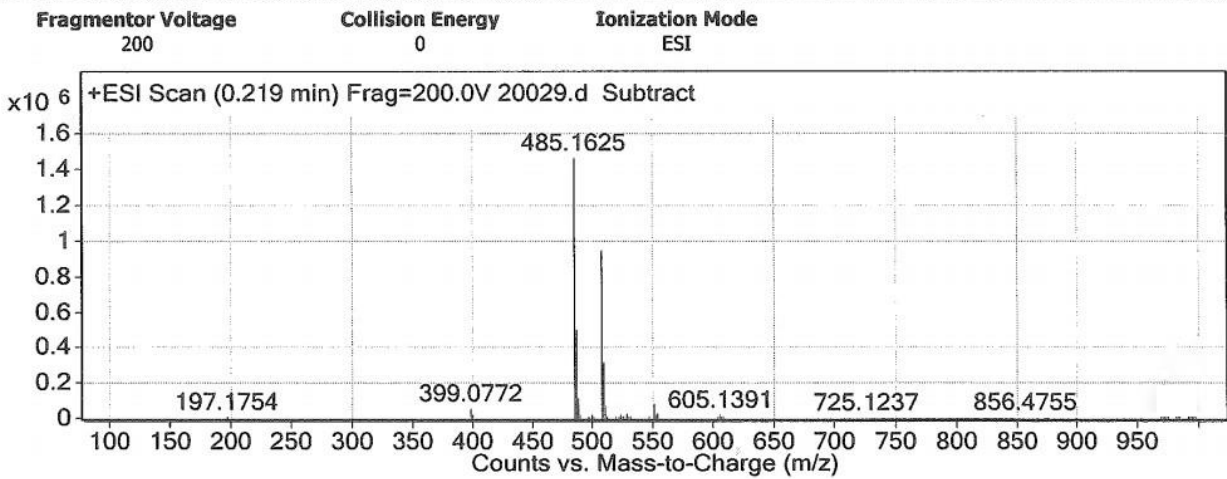

The  $^1\text{H-NMR}$ ,  $^{13}\text{C-NMR}$  and HR-MS spectrum of compound **A11**

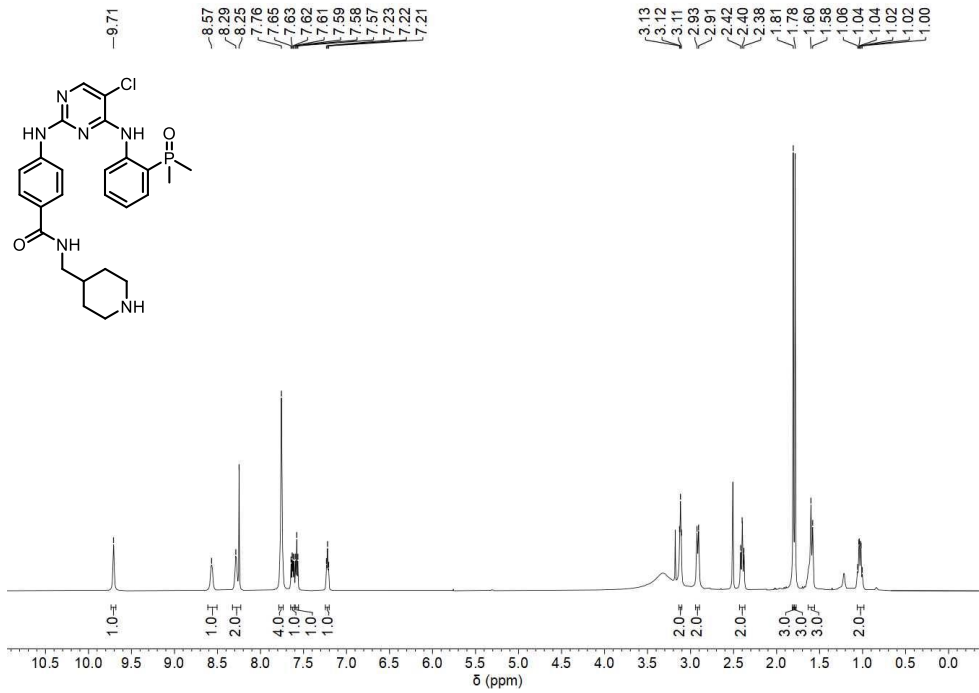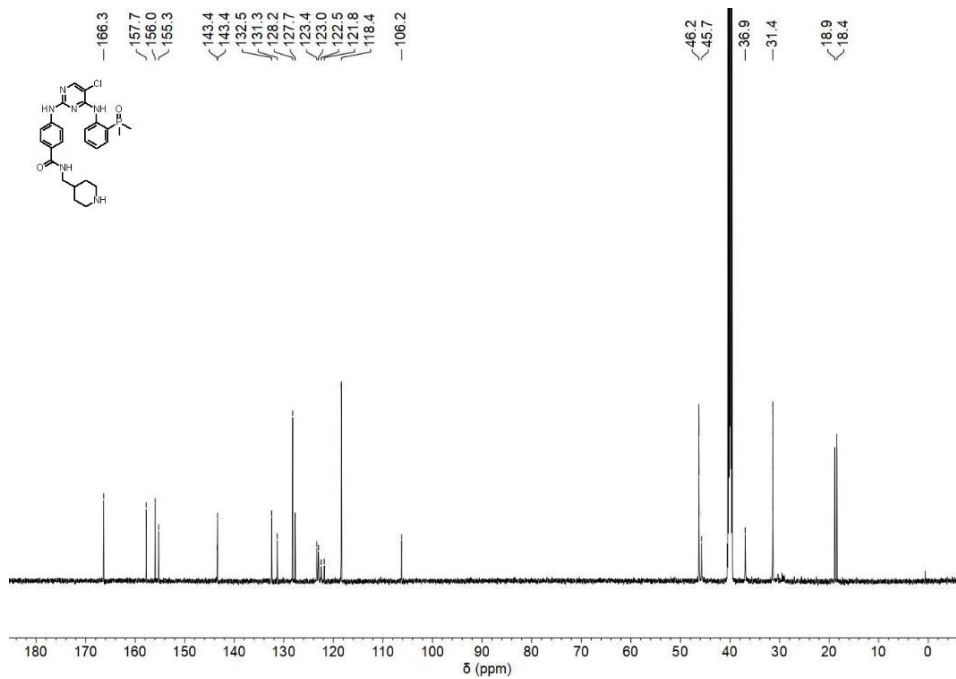

User Spectra

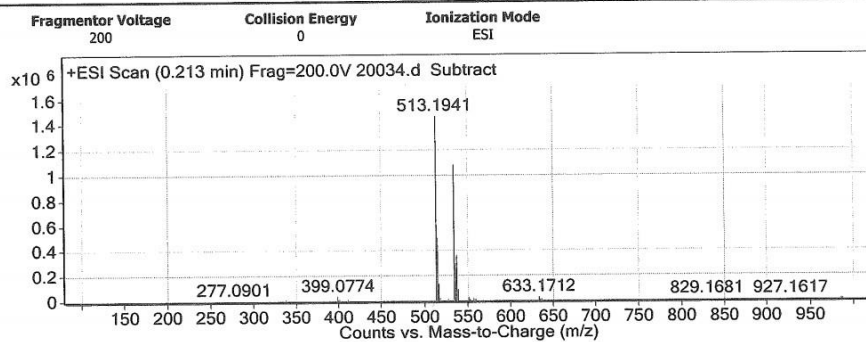

The <sup>1</sup>H-NMR, <sup>13</sup>C-NMR and HR-MS spectrum of compound A12

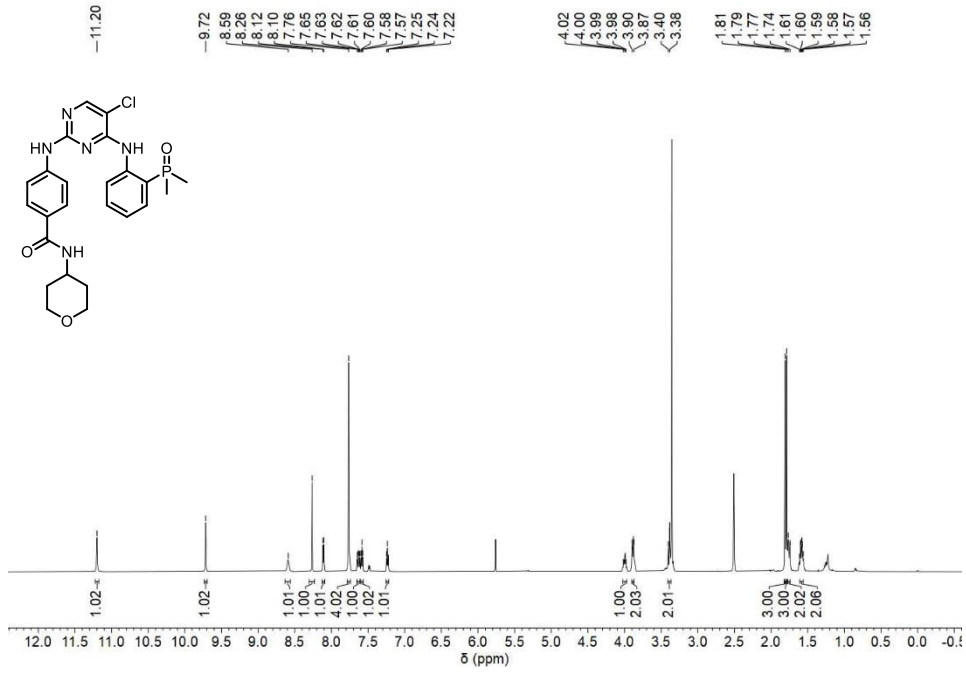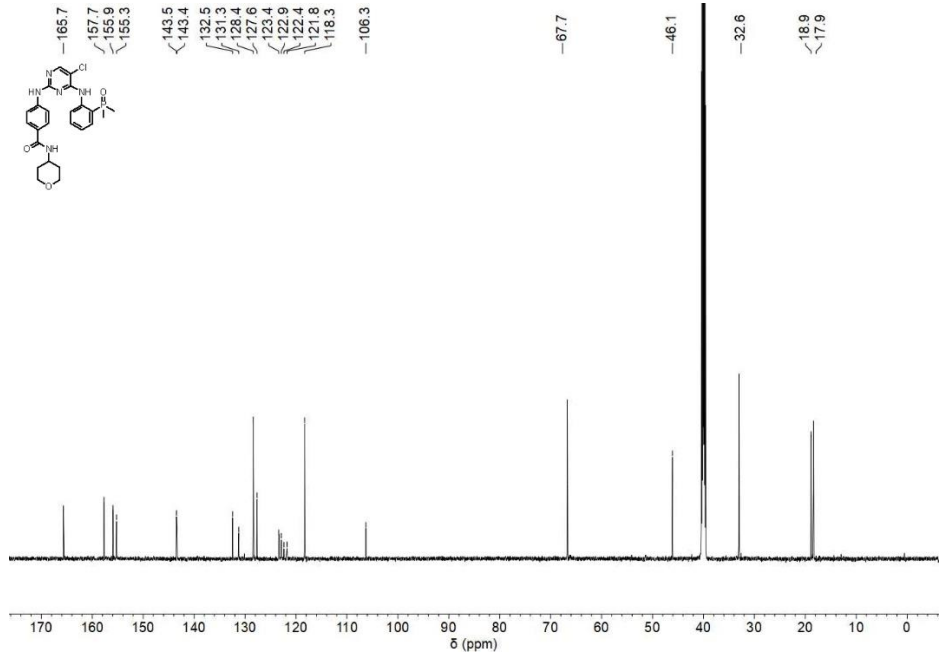

User Spectra

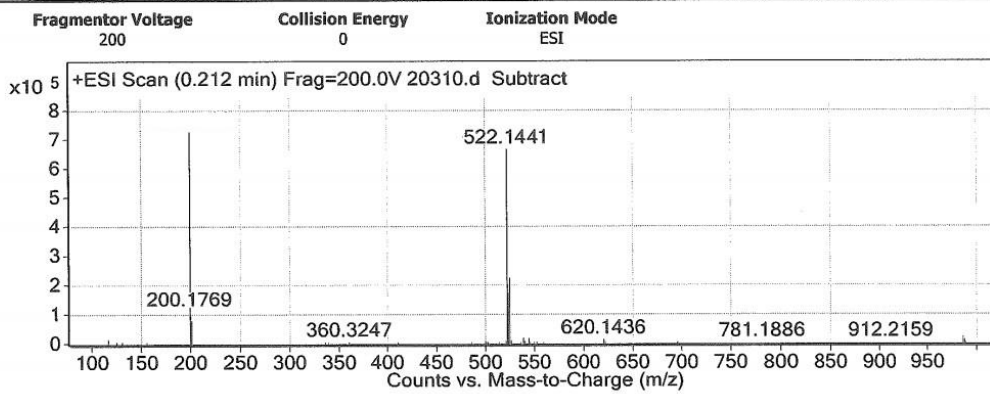

The  $^1\text{H-NMR}$ ,  $^{13}\text{C-NMR}$  and HR-MS spectrum of compound **A13**

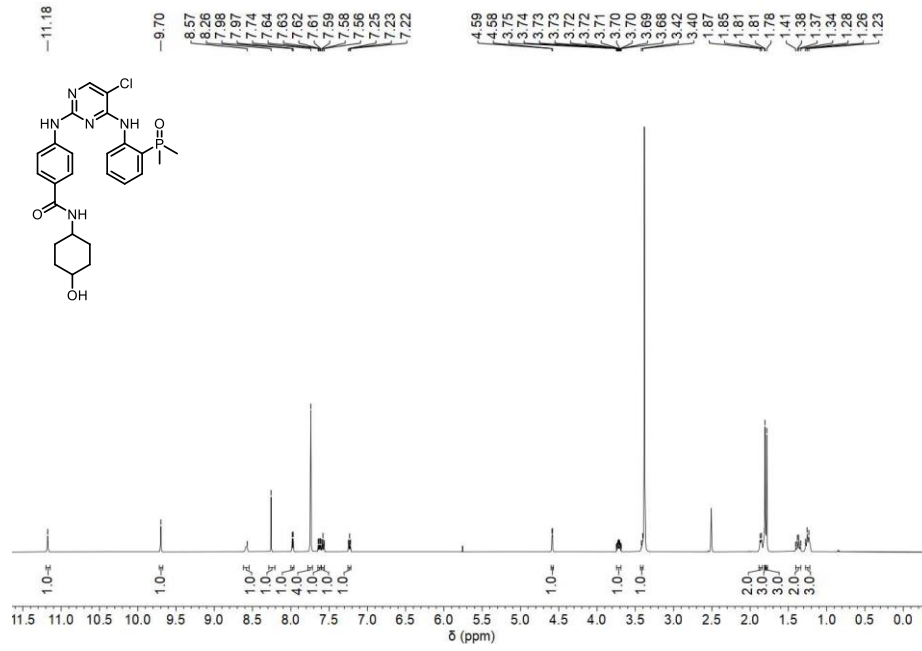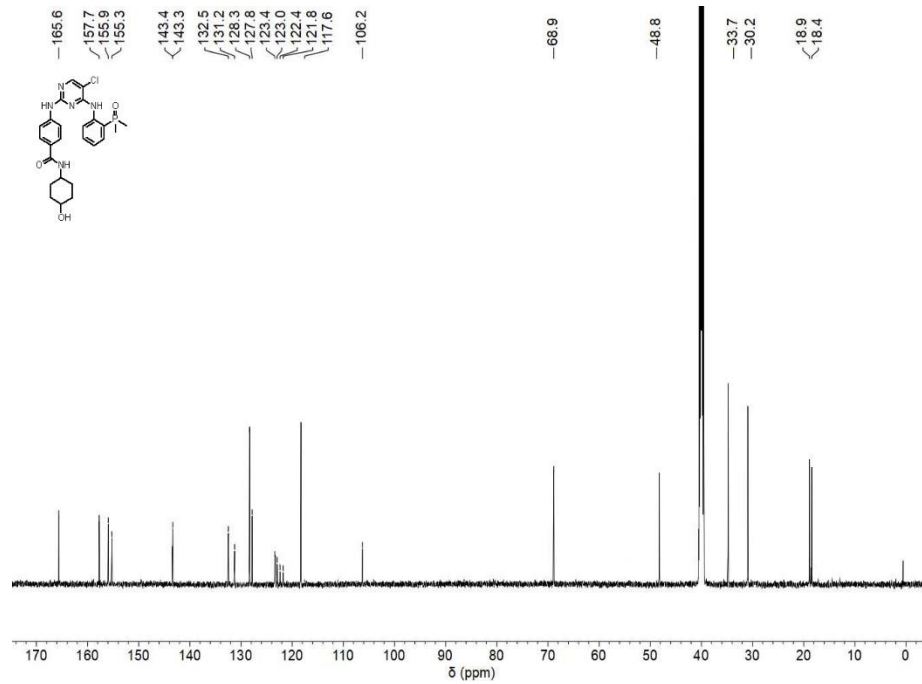

User Spectra

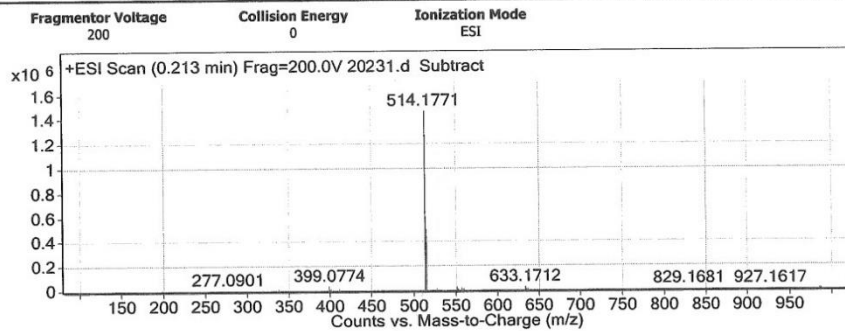

The <sup>1</sup>H-NMR and HR-MS spectrum of compound A14

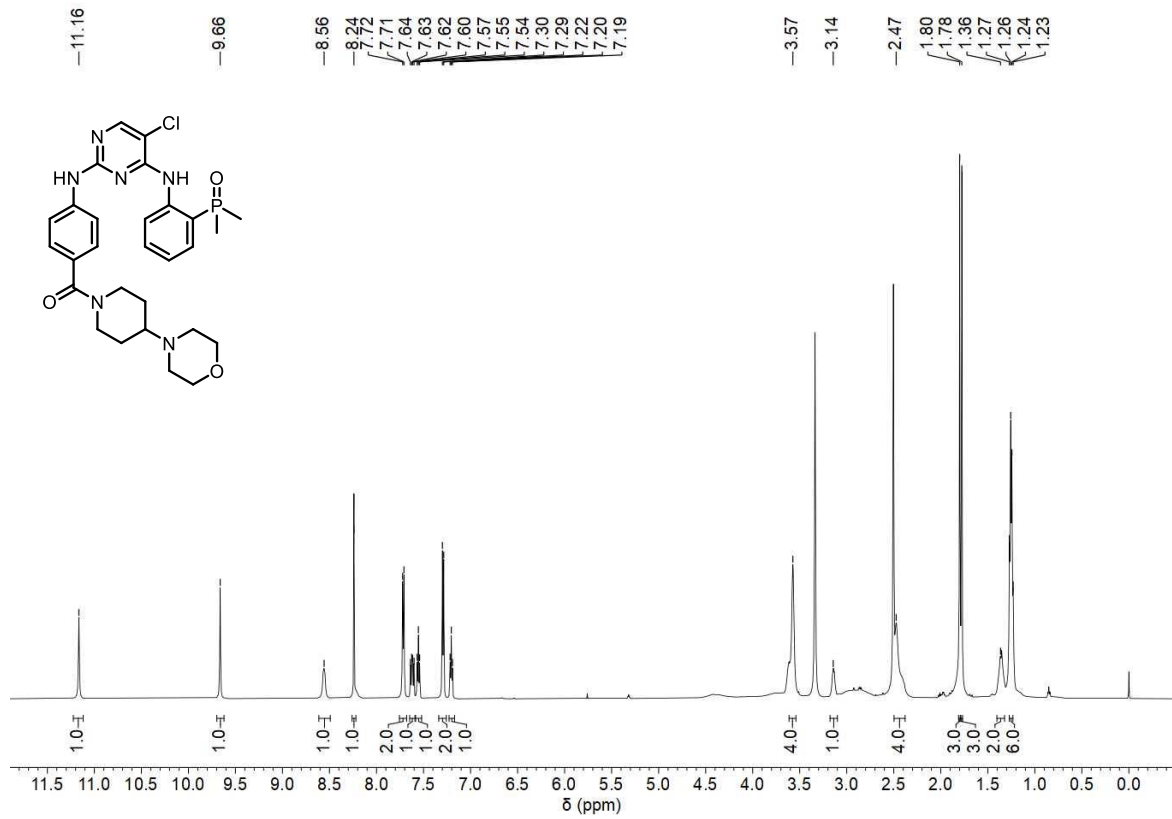

User Spectra

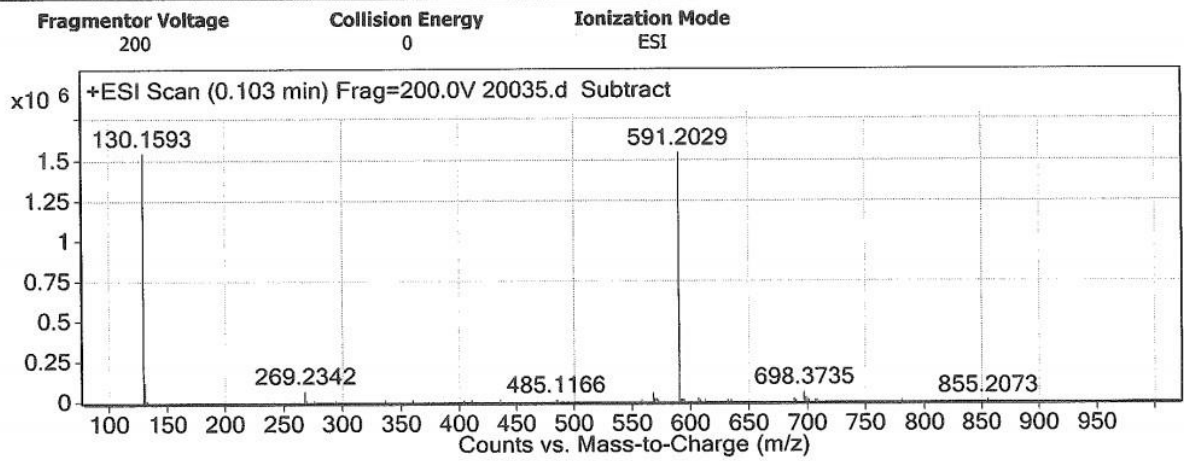

The <sup>1</sup>H-NMR and HR-MS spectrum of compound **B1**

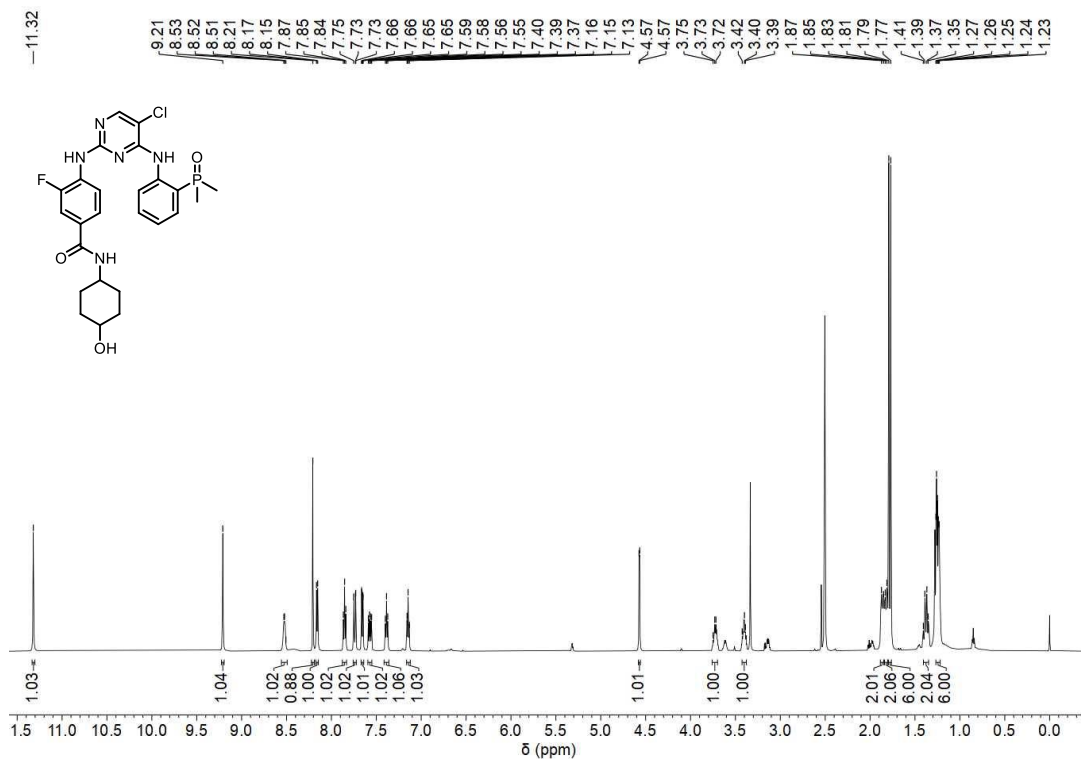

User Spectra

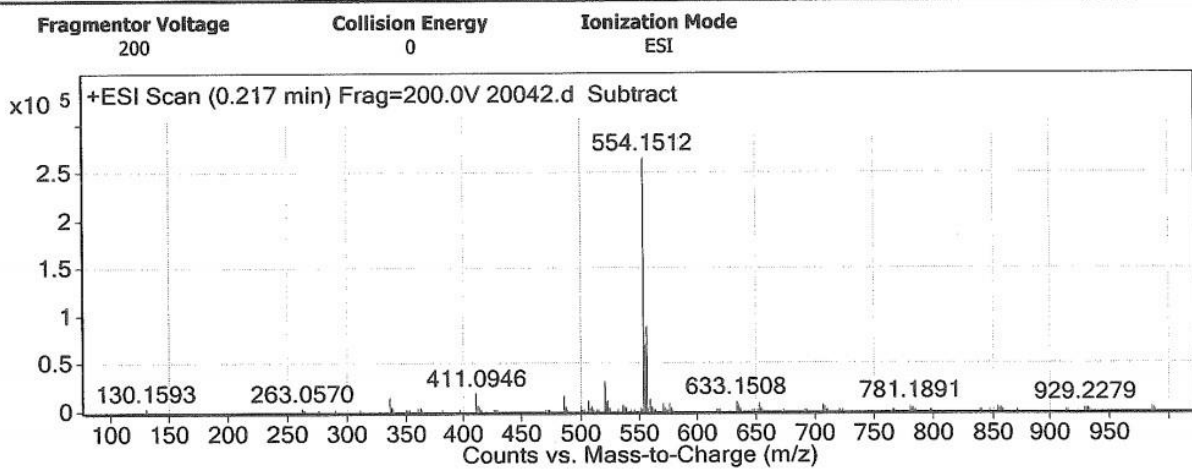

The  $^1\text{H-NMR}$ ,  $^{13}\text{C-NMR}$  and HR-MS spectrum of compound **B2**

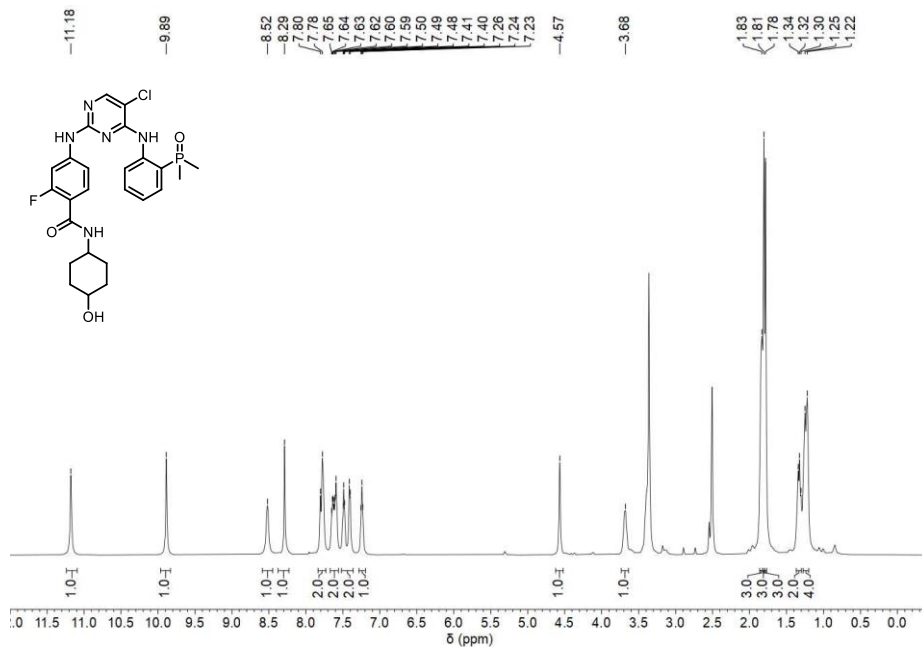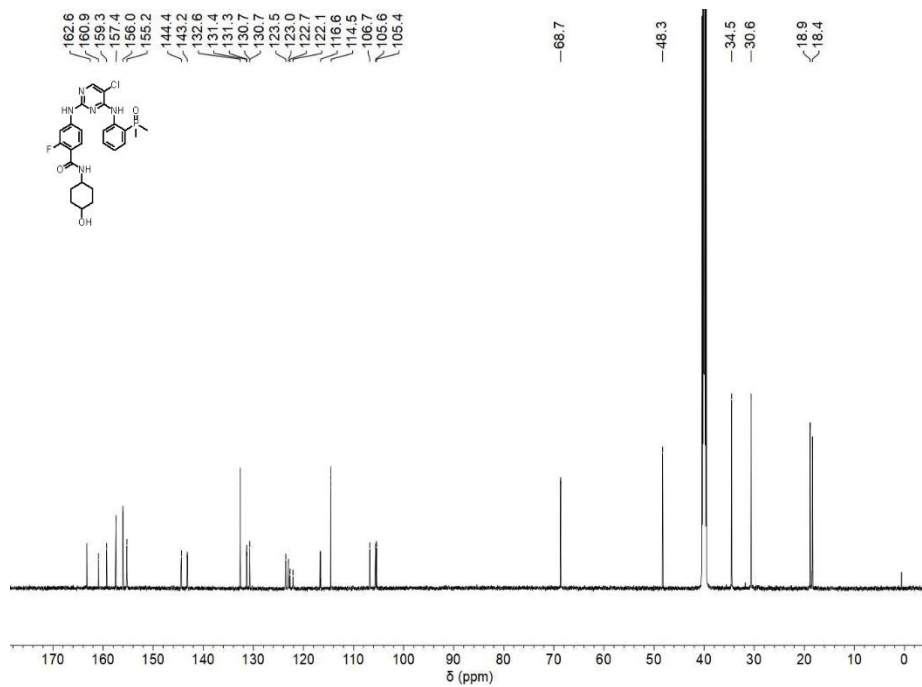

User Spectra

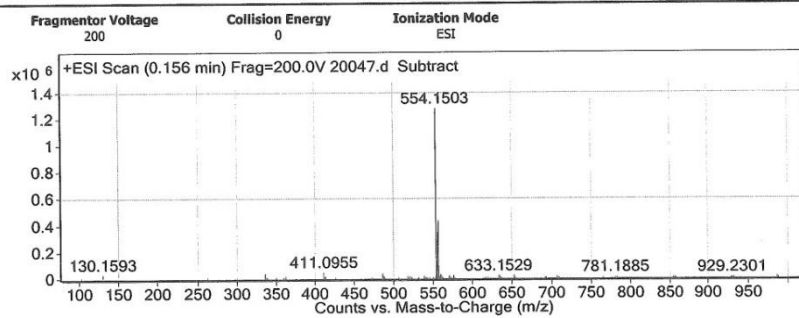



The  $^1\text{H-NMR}$ ,  $^{13}\text{C-NMR}$  and HR-MS spectrum of compound **B3**

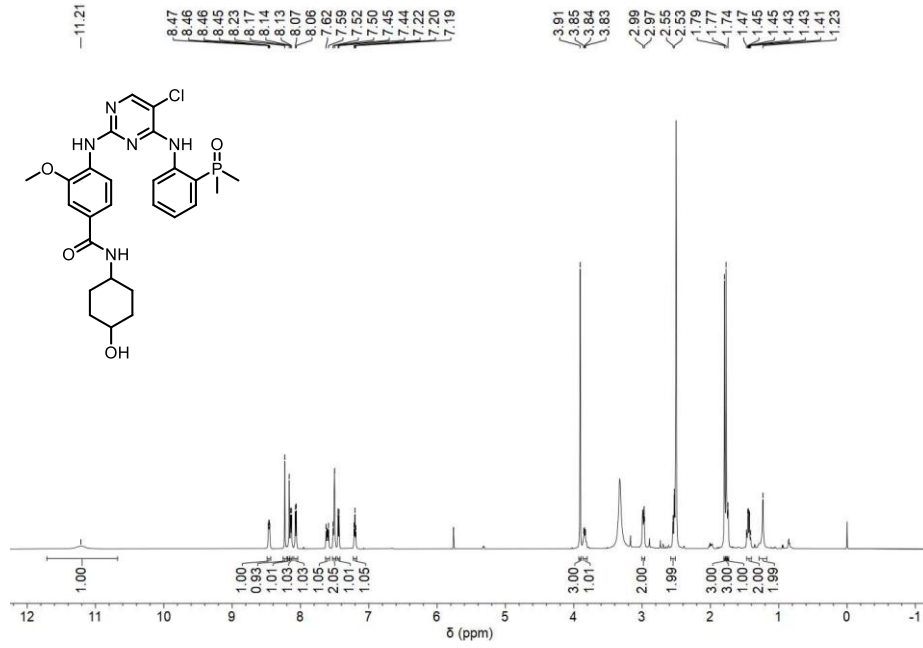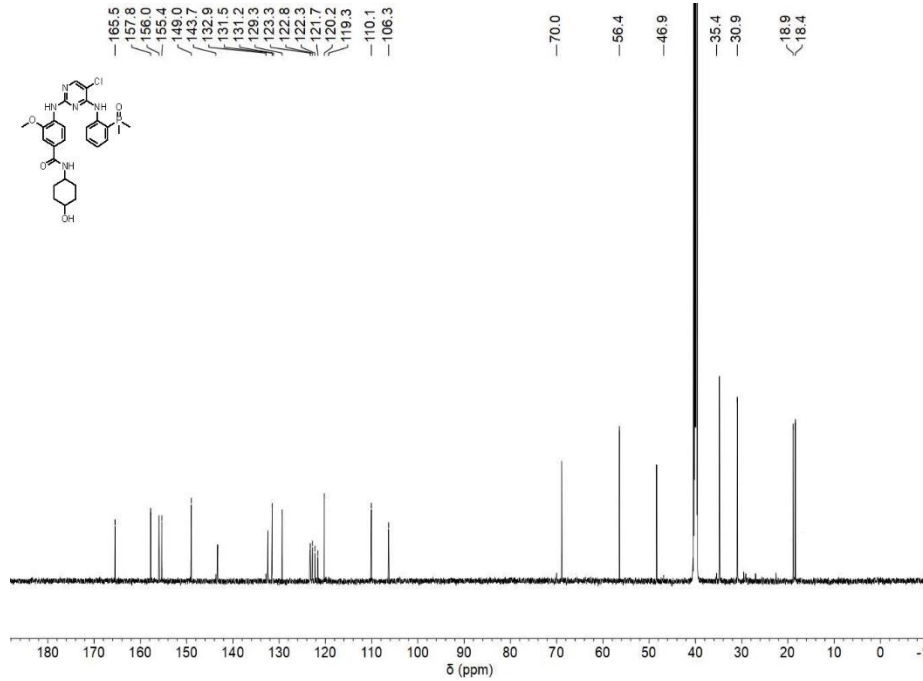

User Spectra

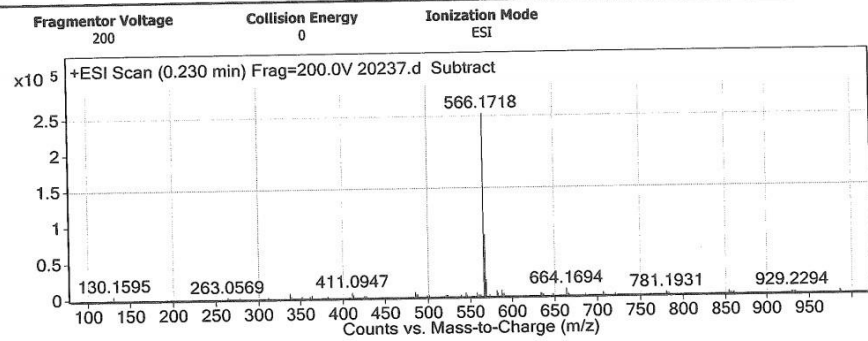

The <sup>1</sup>H-NMR and HR-MS spectrum of compound **B4**

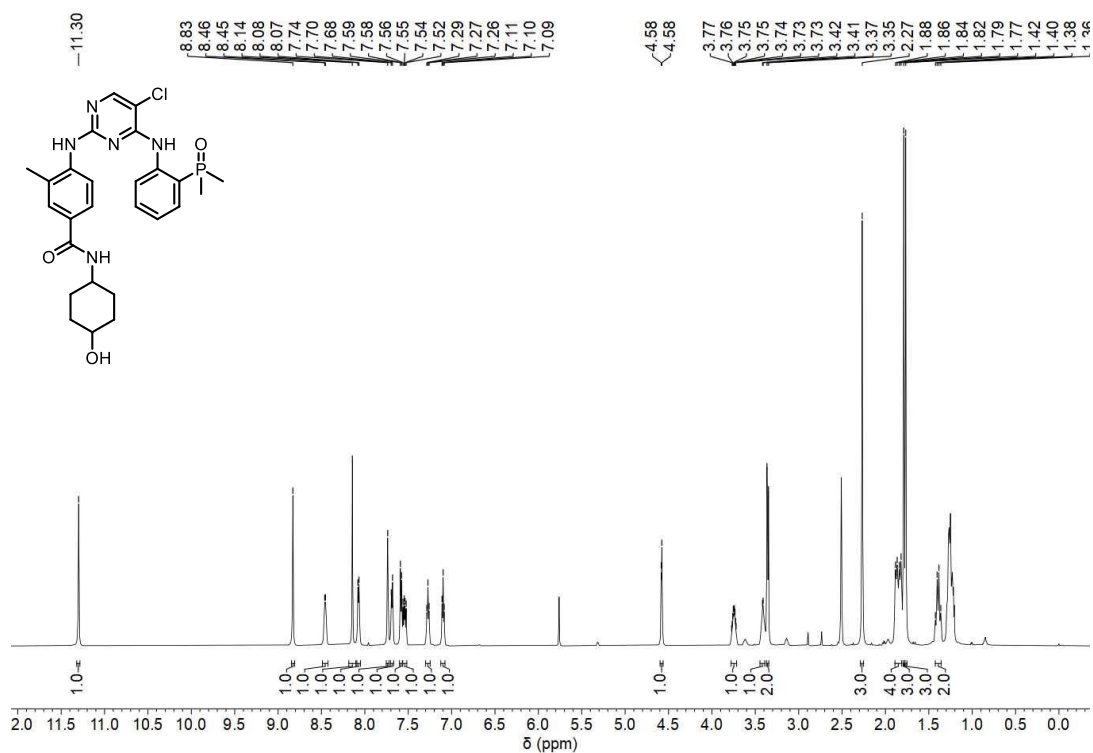

User Spectra

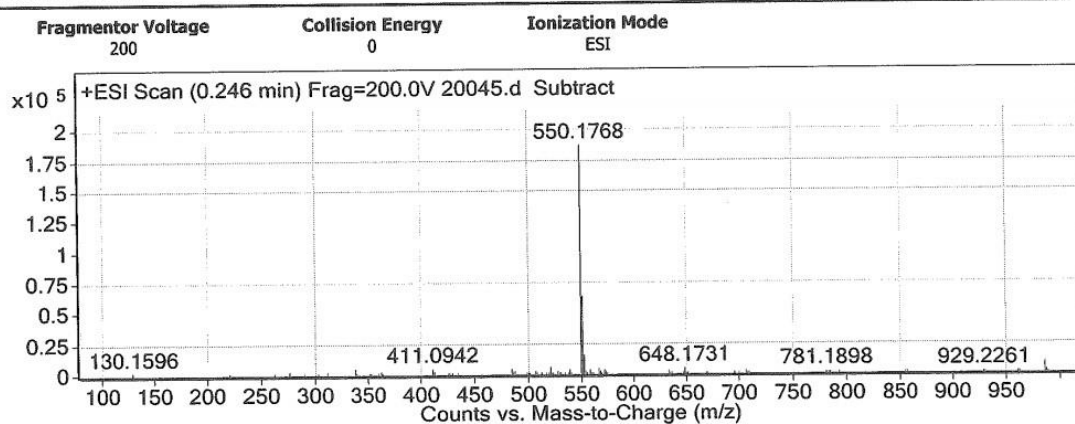

The  $^1\text{H-NMR}$ ,  $^{13}\text{C-NMR}$  and HR-MS spectrum of compound **B5**

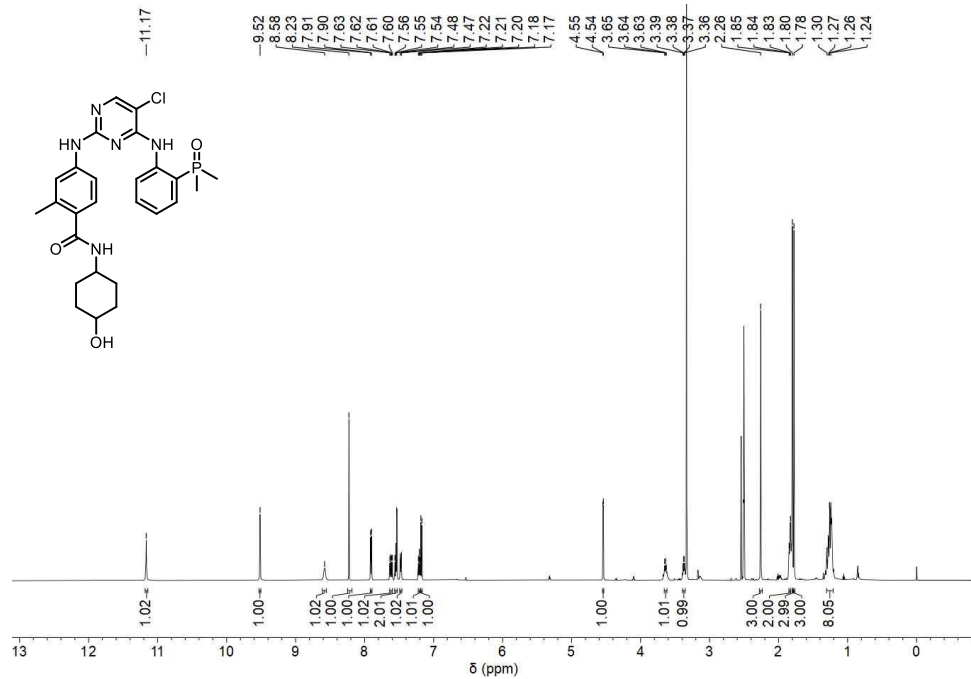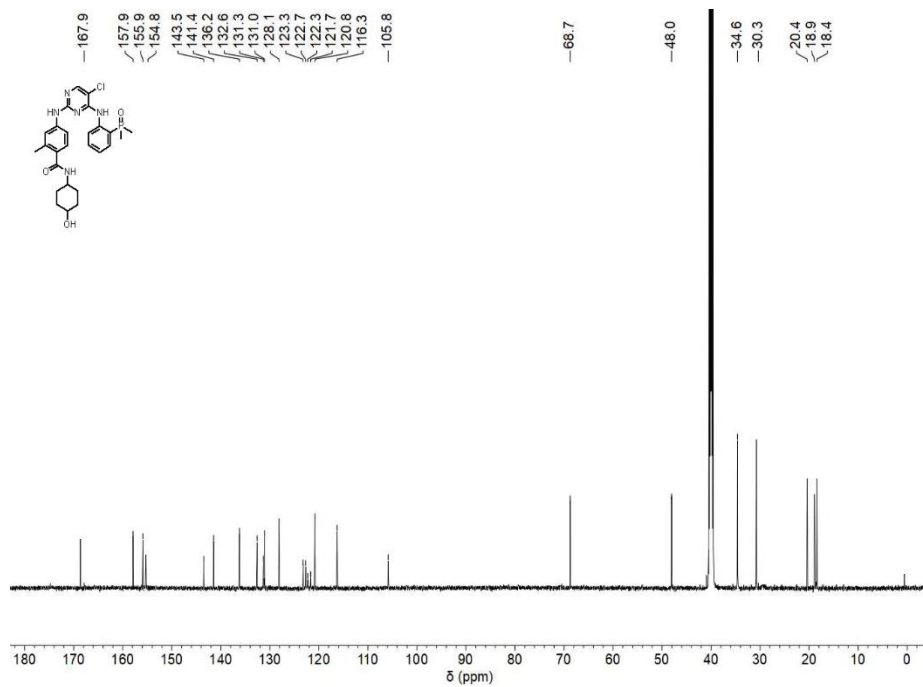

User Spectra

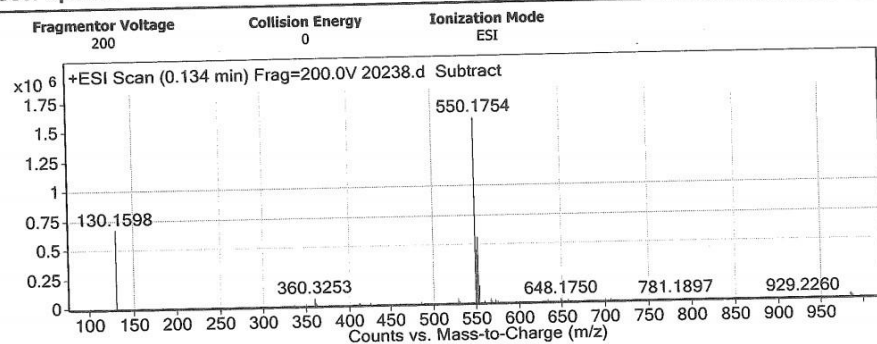

The <sup>1</sup>H-NMR and HR-MS spectrum of compound **B6**

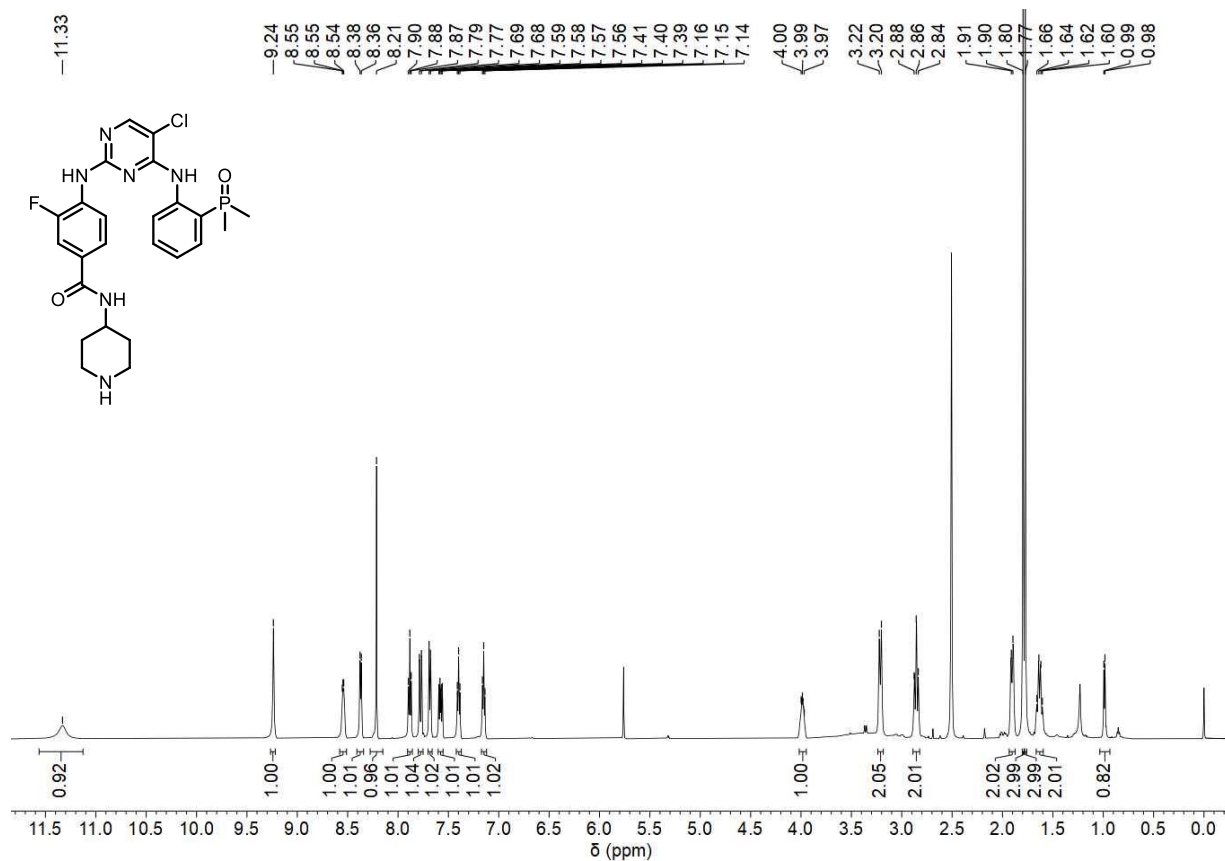

User Spectra

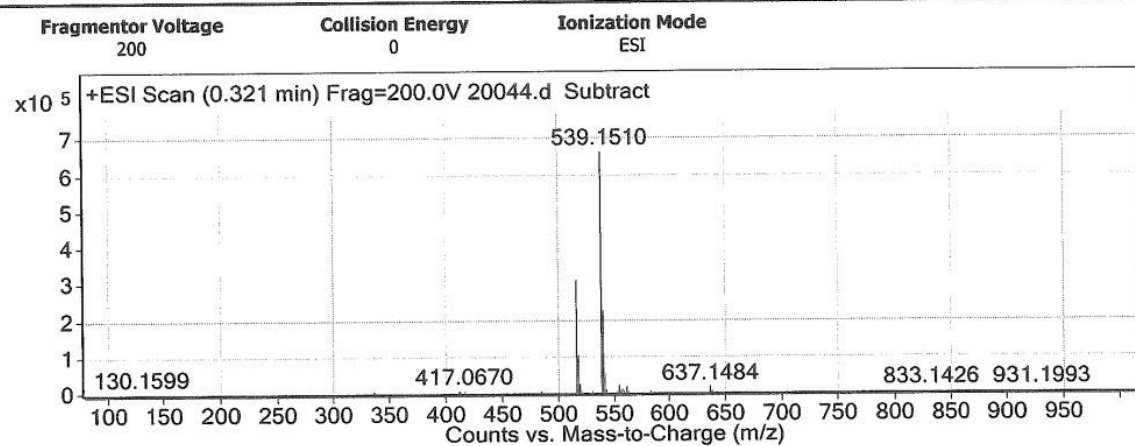

The <sup>1</sup>H-NMR, <sup>13</sup>C-NMR and HR-MS spectrum of compound **B7**

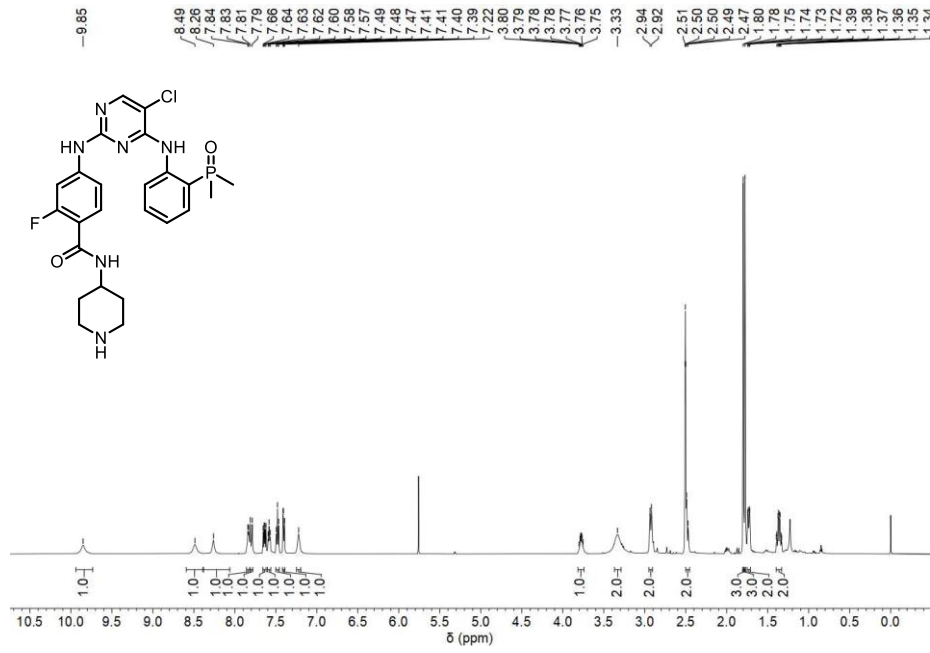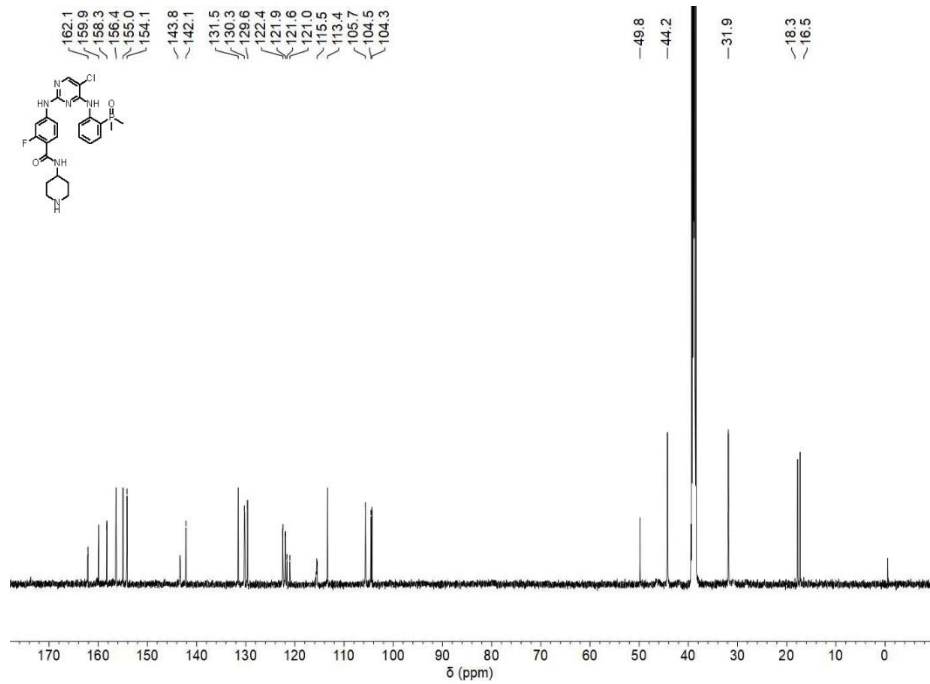

User Spectra

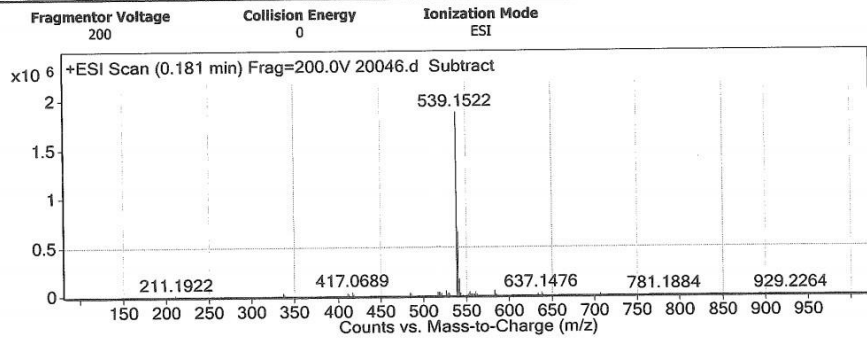

The  $^1\text{H-NMR}$ ,  $^{13}\text{C-NMR}$  and HR-MS spectrum of compound **B8**

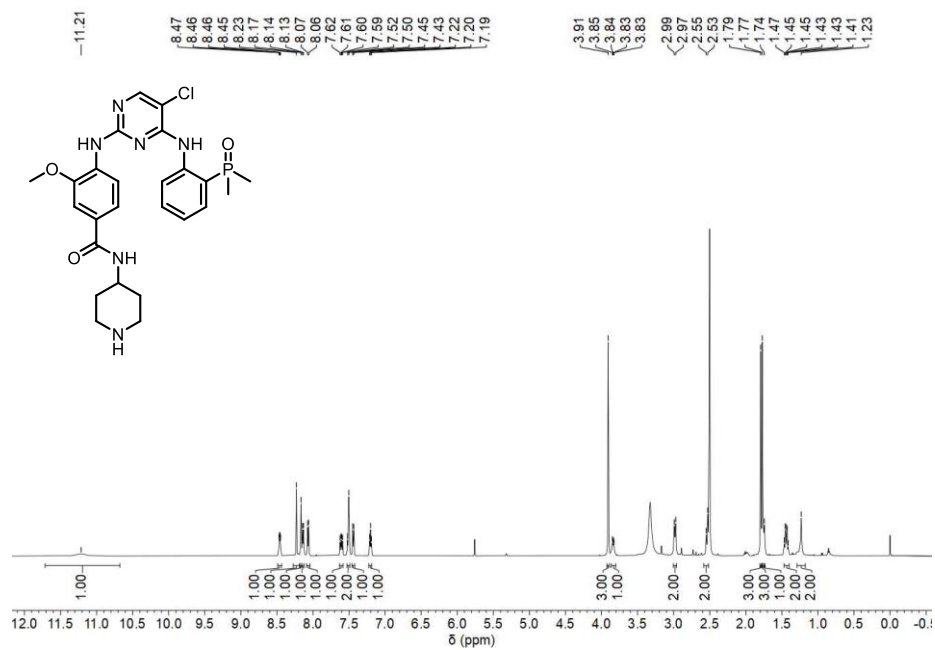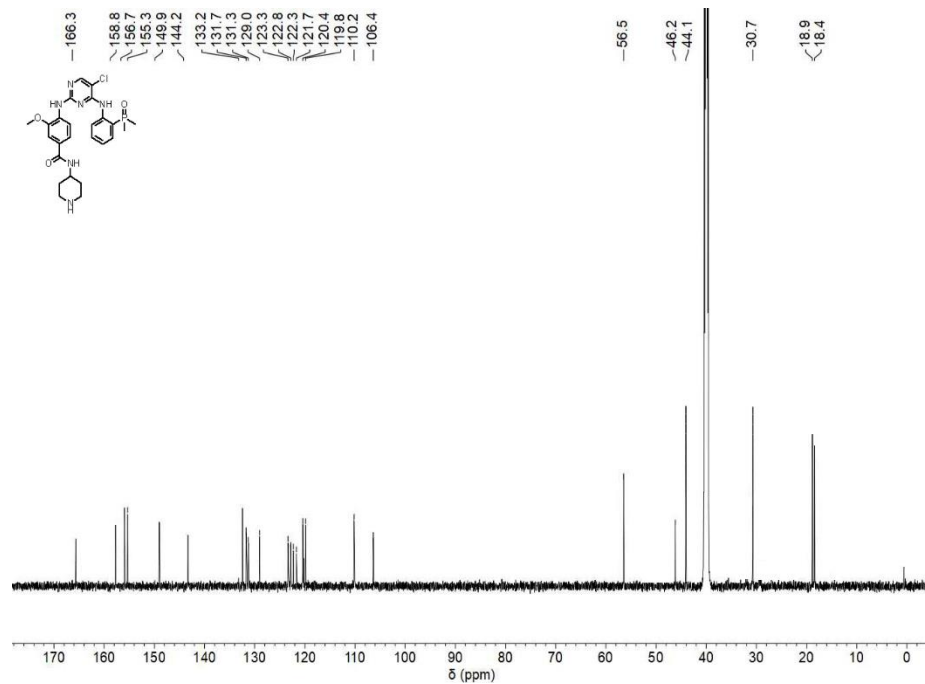

User Spectra

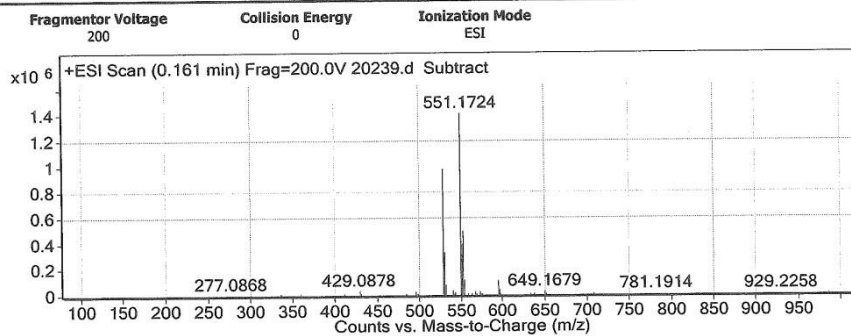

The <sup>1</sup>H-NMR and HR-MS spectrum of compound **B9**

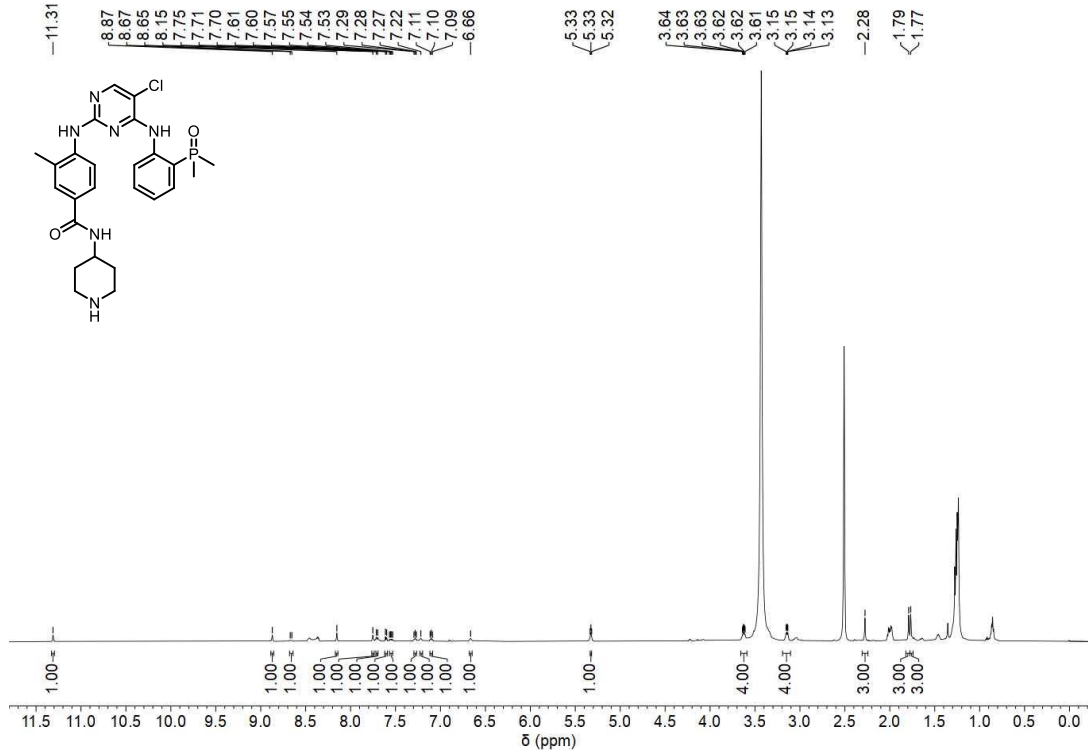

User Spectra

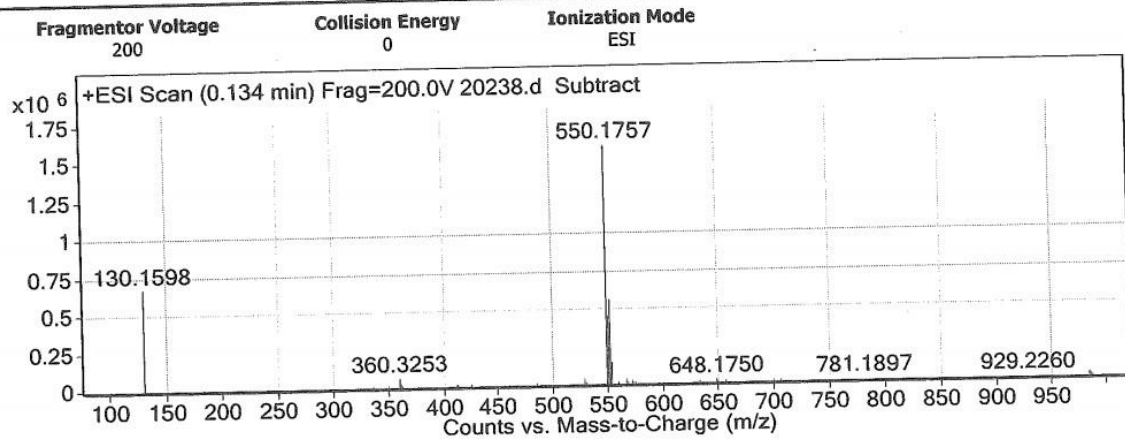

The <sup>1</sup>H-NMR and HR-MS spectrum of compound **B10**

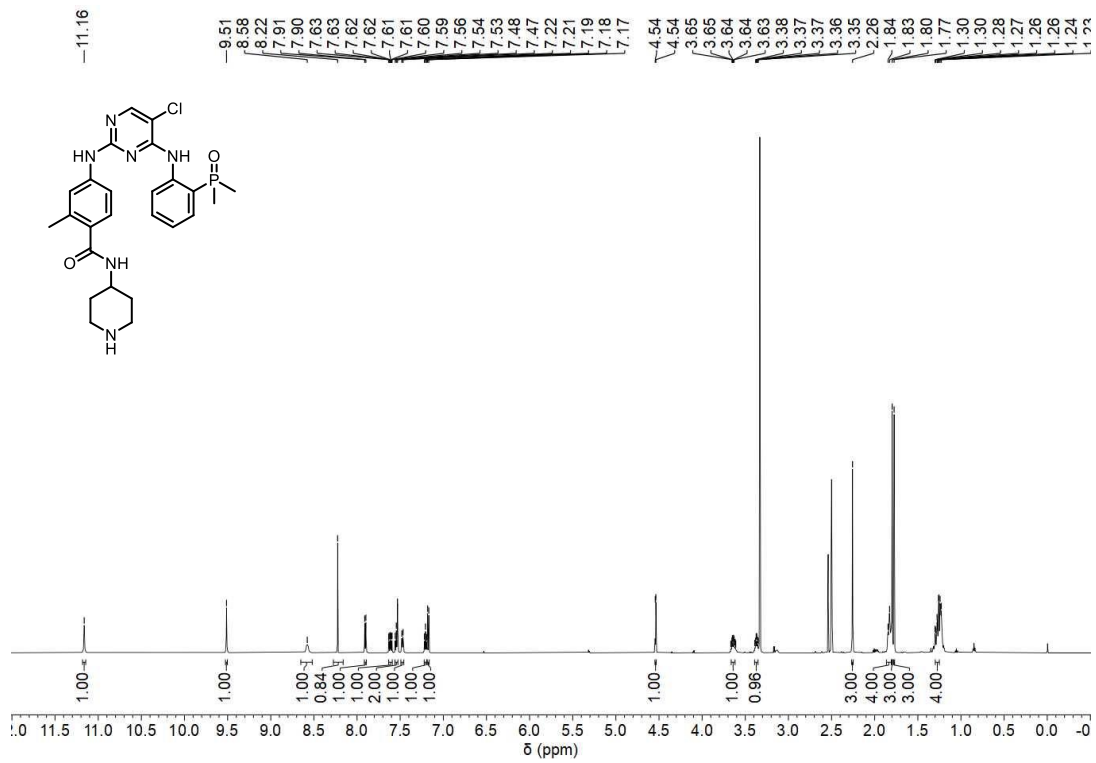

User Spectra

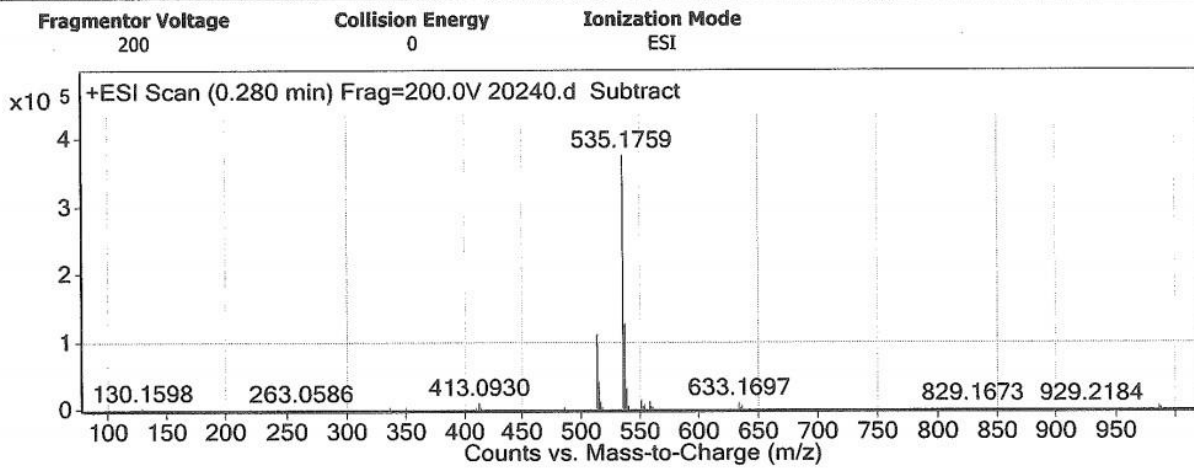

Supplement: d3md00324h1.pdf [file d3md00324h1.pdf]
